1 **Dynein-2 intermediate chains play crucial but distinct roles**  
2 **in primary cilia formation and function**

3

4 Laura Vuolo<sup>1</sup>, Nicola L. Stevenson<sup>1</sup>, Kate J. Heesom<sup>2</sup>, David J. Stephens<sup>1</sup>

5 <sup>1</sup> Cell Biology Laboratories, School of Biochemistry, University of Bristol, Bristol, UK.

6 <sup>2</sup> Proteomics Facility, Faculty of Biomedical Sciences, University of Bristol, Bristol, UK.

7

8 SHORT TITLE: Dynein-2 subunit knockouts define its roles in ciliogenesis

9

10 Number of characters: 38322

11

12 SUMMARY: Here, Vuolo and colleagues use engineered knockout human cell lines to define roles for  
13 dynein-2 intermediate chains. WDR34 is required for axoneme extension, while WDR60 is not. Both  
14 subunits are required for cilia transition zone organization and bidirectional intraflagellar transport.

15 Abstract

16 The dynein-2 microtubule motor is the retrograde motor for intraflagellar transport. Mutations in  
17 dynein-2 components cause skeletal ciliopathies, notably Jeune syndrome. Dynein-2 comprises a  
18 heterodimer of two non-identical intermediate chains, WDR34 and WDR60. Here, we use knockout  
19 cell lines to demonstrate that each intermediate chain has a distinct role in cilia function. Both  
20 proteins are required to maintain a functional transition zone and for efficient bidirectional  
21 intraflagellar transport, only WDR34 is essential for axoneme extension. In contrast, only WDR60 is  
22 essential for co-assembly of the other subunits. Furthermore, WDR60 cannot compensate for loss of  
23 WDR34 or vice versa. This work defines a functional asymmetry to match the subunit asymmetry  
24 within the dynein-2 motor. Analysis of causative point mutations in WDR34 and WDR60 can partially  
25 restore function to knockout cells. Our data show that Jeune syndrome is caused by defects in  
26 transition zone architecture as well as intraflagellar transport.

27

28

## 29 Introduction

30 Cytoplasmic dyneins are minus-end directed motors that use the energy of ATP hydrolysis to move  
31 along microtubules. Two cytoplasmic dyneins have been identified. The better-characterized dynein-  
32 1 is involved in the transport of cargos in the cytoplasm, organelle dynamics and in mitotic spindle  
33 organization during mitosis (Roberts et al., 2013). Dynein-2 is responsible for retrograde transport in  
34 cilia and flagella. Primary (non-motile) cilia are hair-like extensions present on almost all animal cells  
35 that act as antennae for extracellular signals and are fundamental to proper metazoan development  
36 and ongoing health. They integrate signals in key pathways including sonic hedgehog (Shh), Wnt and  
37 platelet-derived growth factor signaling and participate in metabolic control and autophagy (Reiter  
38 and Leroux, 2017). Cilia are particularly important to ensure correct Shh signaling during embryonic  
39 development (Goetz and Anderson, 2010; He et al., 2017). Defects in cilia are linked to many human  
40 diseases, known collectively as ciliopathies, including developmental disorders, neurodegeneration  
41 and metabolic diseases (Reiter and Leroux, 2017; Yee and Reiter, 2015).

42 Ciliogenesis is initiated in non-dividing cells by the docking of pre-ciliary vesicles with the mother  
43 centriole. The pre-ciliary vesicles fuse and then surround the mother centriole concomitant with the  
44 assembly of a series of protein modules that form a diffusion barrier separating the distal end of the  
45 mother centriole from the rest of the cell cytoplasm (Garcia-Gonzalo et al., 2011). A microtubule  
46 bundle, the axoneme, then extends from the centriole to allow cargo transport by the process of  
47 intraflagellar transport (IFT) (Yee and Reiter, 2015). A “transition zone” (TZ) that separates the  
48 mother centriole from the main length of the axoneme forms a diffusion barrier for both soluble and  
49 membrane proteins at the base of the cilium (Garcia-Gonzalo et al., 2011; Garcia-Gonzalo and Reiter,  
50 2017). Once established, cilia are maintained and operated by the process of IFT (Hou and Witman,  
51 2015). IFT-B complexes (comprising of a core subcomplex, including nine subunits (IFT88, -81, -74, -  
52 70, -52, -46, -27, -25, and -22) with five additional, peripherally-associated subunits (IFT172, -80, -57,  
53 -54, and -20)) undergo kinesin-2-driven motility from base to tip where the complexes are then  
54 reorganized prior to retrograde transport of IFT-A (comprising 6 subunits (IFT144, IFT140, IFT139,  
55 IFT122, IFT121/WDR35, and IFT43)) driven by dynein-2 (Hou and Witman, 2015; Jensen and Leroux,  
56 2017). This process ensures the correct localization of receptors and signaling molecules within cilia  
57 as well as act in signal transduction from the cilium to the rest of the cell.

58 The genes encoding subunits of the dynein-1 and dynein-2 motors are largely distinct. Some light  
59 chain subunits are common to both but the major subunits (heavy, intermediate and light  
60 intermediate chains) are different between the two holoenzyme complexes. Dynein-2 is built around  
61 a heavy chain dimer of DYNC2H1 (DHC2) (Criswell et al., 1996; Mikami et al., 2002). This associates

62 with two intermediate chains, WDR34 and WDR60, first identified as dynein-2 subunits named  
63 FAP133 and FAP163 in *Chlamydomonas* (Patel-King et al., 2013; Rompolas et al., 2007) and  
64 subsequently shown to be components of metazoan dynein-2 (Asante et al., 2013; Asante et al.,  
65 2014). This asymmetry distinguishes dynein-2 from dynein-1 where two identical IC subunits form  
66 the holoenzyme. The reason for this asymmetry is unclear. In addition, a dynein-2-specific light  
67 intermediate chain (DYNC2LI1/LIC3) has been identified (Hou and Witman, 2015; Mikami et al.,  
68 2002) as well as a specific light chain, TCTEX1D2 (Asante et al., 2014; Schmidts et al., 2015).  
69 Mutations in genes encoding dynein-2 subunits are associated with skeletal ciliopathies, notably  
70 short rib-polydactyly syndromes (SRPSs) and Jeune asphyxiating thoracic dystrophy (JATD, Jeune  
71 syndrome). These are recessively inherited developmental disorders characterized by short ribs,  
72 shortened tubular bones, polydactyly and multisystem organ defect (Huber and Cormier-Daire,  
73 2012). In recent years, whole exome-sequencing technology has enabled the identification of new  
74 mutations involved in skeletal ciliopathies, notably a range of mutations affecting dynein-2 heavy  
75 chain (DYNC2H1 or DHC2, (Chen et al., 2016; Cossu et al., 2016; Dagonneau et al., 2009; El Hokayem  
76 et al., 2012; Mei et al., 2015; Merrill et al., 2009; Okamoto et al., 2015; Schmidts et al., 2013a)).  
77 Additionally, mutations in WDR34 (Huber et al., 2013; Schmidts et al., 2013b), WDR60 (Cossu et al.,  
78 2016; McInerney-Leo et al., 2013), LIC3 (Kessler et al., 2015; Taylor et al., 2015) and TCTEX1D2  
79 (Schmidts et al., 2015) have also been reported. The role of dynein-2 heavy chain has been  
80 extensively studied in *Chlamydomonas*, *C. elegans*, and mice. In all cases, loss of dynein heavy chain  
81 results, in short, stumpy cilia that accumulate IFT particles at the tip, consistent with a role of  
82 dynein-2 in retrograde ciliary transport (Hou and Witman, 2015). Recently, more interest has been  
83 focused on the role of the subunits associated with DHC2. Two studies in *Chlamydomonas* and in  
84 human patient-derived fibroblasts revealed that LIC3 (D1bLIC in *Chlamydomonas*) plays an important  
85 role for ciliogenesis and stability of the entire dynein-2 complex (Li et al., 2015; Taylor et al., 2015).  
86 Similarly, loss of Tctex2b (TCTEX1D2) destabilizes dynein-2 and reduces IFT in *Chlamydomonas*  
87 (Schmidts et al., 2015).

88 Previous work from our lab and others has shown that loss of function of dynein-2 intermediate  
89 chains, WDR34 and WDR60, is associated with defects in cilia. Knockdown of WDR60 or WDR34 in  
90 hTERT-RPE1 cells results in a reduction of ciliated cells, with an increase or decrease of the cilia  
91 length, likely depending on depletion efficiency (Asante et al., 2014). Mutations in WDR34 have also  
92 been shown to result in short cilia with a bulbous ciliary tip in patients fibroblast cells affected by  
93 SRP (Huber et al., 2013). Consistent with the results obtained in patient cells, loss of WDR34 in mice  
94 also results in short and stumpy cilia with an abnormal accumulation of ciliary proteins and defects  
95 in Shh signaling (Wu et al., 2017). Similarly, mutations in WDR60 patient fibroblasts are associated

Vuolo et al. *Dynein-2 knockouts define its role in ciliogenesis.*

96 with a reduction in cilia number, although the percentage of ciliated cells was variable in different  
97 affected individuals (McInerney-Leo et al., 2013). These findings are all consistent with roles for  
98 WDR34 and WDR60 in IFT.

99 In this study, we sought to better understand the role of dynein-2 in human cells using engineered  
100 knockout (KO) cell lines for WDR34 and WDR60. We define a functional asymmetry within the  
101 complex, where WDR34 is absolutely required for ciliogenesis, while WDR60 is not. In contrast,  
102 WDR60 is essential to maintain the integrity of the ciliary transition zone and for retrograde  
103 trafficking of IFT particles. Furthermore, by expressing HA-tagged WDR34 in WDR60 KO cells and HA-  
104 tagged WDR60 in WDR34 KO cells, we found that WDR34 is not required for the other subunits to  
105 assemble, whereas loss of WDR60 leads to significant defects in dynein-2 holocomplex assembly. We  
106 propose a model where dynein-2 requires WDR34 for axoneme extension but not for the assembly  
107 of the other subunits of the complex, whereas WDR60 is crucial for dynein-2 stability, IFT, and ciliary  
108 transition zone assembly and/or maintenance. Analysis of disease-causing patient mutations further  
109 defines the role of dynein-2 in cilia formation and function.

110

## 111 Results

### 112 *WDR34 or WDR60 play different roles in cilia function*

113 To understand the function of WDR34 and WDR60, we generated KO human telomerase-  
114 immortalized RPE1 (hTERT-RPE1) cells using CRISPR-Cas9. We derived two WDR34 KO clones (1 and  
115 2) using guide RNAs (gRNAs) targeting exons 2 and 3, and one KO clone for WDR60, targeting exon 3.  
116 Genomic sequencing of these clones identified insertion/deletion mutations on the targeted  
117 sequences (Fig. S1). All cell clones were analyzed for protein expression by immunoblot using  
118 polyclonal antibodies. Neither WDR34 nor WDR60 was detected in the respective KO cells compared  
119 to the controls (Fig. S2A and Fig. S2B) which provides evidence that downstream initiation sites are  
120 not being used. To mitigate against the possibility of any off-target effects, we grew KO cells  
121 alongside control CRISPR cells which had been transfected and treated the same way as the KO, but  
122 genomic sequencing showed no mutation at the target site. These cells (WDR34 KO CTRL and  
123 WDR60 KO CTRL) did not present any cilia defects when stained with Arl13b or IFT88 (Fig. S2C and  
124 S2D). Images in all figures show WT cells where indicated. Indistinguishable results were obtained  
125 using these control cell lines. Defects in ciliogenesis in both WDR34 and WDR60 KO cells were  
126 rescued by overexpressing WT proteins, confirming that the phenotypes we observed were not due  
127 to off-target mutations (described below).

128 Loss of WDR34 severely impaired the ability of these cells to extend a microtubule axoneme (Fig. 1A,  
129 B), although Arl13b localized within those few cilia that did form. In contrast, loss of WDR60 did not  
130 significantly affect the ability of cells to extend an axoneme (Fig. 1B). Cilia were shorter in both  
131 WDR60 and WDR34 KO cells (Fig. 1C). Next, we examined the assembly and structure of primary cilia  
132 in WDR34 and WDR60 KO cells by transmission electron microscopy (EM). After 24 hr of serum  
133 starvation, WT RPE1 cells extend a defined axoneme surrounded by a ciliary membrane (Fig. 1D). In  
134 contrast, WDR34 KO cells failed to extend an axoneme (Fig. 1E) but showed a large docked pre-  
135 ciliary vesicle, consistent with the small Arl13b-positive structures seen by immunofluorescence.  
136 WDR60 KO cells showed apparently normal cilia (Fig. 1F) with normal basal body structures and  
137 axoneme extension. However, when an entire cilium was captured in WDR60 KO serial sections (Fig.  
138 1G), we observed a bulged cilia tip containing accumulated electron dense particles (Fig. 1H). To our  
139 surprise, we also observed the ciliary membrane bulged at a second point along the axoneme and  
140 this region contained intraciliary vesicular structures (Fig. 1Hi).

### 141 *Loss of WDR34 and WDR60 causes accumulation of proteins at the ciliary tip*

142 The abnormal structure of cilia in the KO cells led us to analyze the steady-state localization of the  
143 IFT machinery. After 24 hr serum starvation, IFT88 (part of IFT-B) was found almost exclusively at the

144 base of the cilia in wild-type (WT) RPE1 cells (Fig. 2A, quantified in Fig. 2Ai), but in WDR60 KO and  
145 WDR34 KO cells IFT88 was found throughout the cilia and accumulated at the tip (Fig. 2A, 2Aii, and  
146 2Aiii). Similarly, another IFT-B component, IFT57 (Fig. 2B) was enriched at the cilia tips in WDR60 and  
147 WDR34 KO cells. Quantification of the localization of these IFT-B proteins showed an accumulation  
148 of both IFT88 (Fig. 2C) and IFT57 (Fig. 2D) at both the base and tip of the cilia in WDR60 KO cells. In  
149 WDR34 KO cells, IFT-B proteins were seen to accumulate at the tip of cilia. The accumulation at the  
150 base seen in WDR60 KO cells was not evident in WDR34 KO cells. The limited numbers of ciliated  
151 WDR34 KO cells precluded further quantification. Another IFT-B protein, IFT20 (Fig. 2E), was  
152 enriched at both the tip and the base of cilia in WDR60 KO cells (quantification in Fig. 2F). IFT20 is  
153 the only IFT component found to localize to the Golgi until now. As expected, IFT20-GFP was found  
154 at the Golgi in WT cells, although the Golgi pool of IFT20-GFP seen in WT cells was largely absent  
155 from WDR60 KO cells (Fig. 2G).

156 Next, we analyzed the localization of IFT-A proteins. We found that both IFT140 (Fig. 3A) and IFT43  
157 (Fig. 3B) were accumulated along the length of the axoneme within cilia in WDR60 KO cells, as well  
158 as at the tips in the few cilia present in WDR34 KO cells, while they were found only at the base of  
159 the cilia in WT cells (quantification in Fig. 3Ai-iii and 3Bi-iii). Further quantification showed that both  
160 IFT140 (Fig. 3C) and IFT43 (Fig. 3D) are accumulated in WDR60 KO cilia compared to controls. Both  
161 IFT140 and IFT43 show a more pronounced accumulation at ciliary tips in WDR34 KO cells. In  
162 addition, we determined the localization of a subunit of the anterograde kinesin-2 motor, KAP3  
163 which was also accumulated at the ciliary tip of WDR60 KO (Fig. 3E).

164 To study whether defects in dynein-2 affect the transport of membrane proteins we used GFP-  
165 fusions with Arl13b, somatostatin receptor type 3 (SSTR3), 5-hydroxytryptamine receptor type 6  
166 (5HT6) and Rab8a. We found that in live cells Arl13b-GFP and EGFP-SSTR3 accumulate at the ciliary  
167 tip (Fig. 4A and 4B). Surprisingly, we also noticed a consistent reduction in the amount of Arl13b-GFP  
168 within cilia in WDR60 KO cells (Fig. 4C and 4Ci). The same observation was made with EGFP-SSTR3  
169 (Fig. 4D and 4Di) and EGFP-5HT6 (Fig. 4E and 4Ei). In contrast, GFP-Rab8a localization in the cilia was  
170 indistinguishable between WT and WDR60 KO cells (Fig 4F and 4Fi).

#### 171 *Dynein-2 is required for ciliary transition zone assembly*

172 Previous studies have shown that the protein content of cilia is maintained by a diffusion barrier  
173 formed by the transition zone. Changes in transition zone composition have been associated with  
174 the mislocalization of ciliary proteins, including the membrane marker Arl13b (Li et al., 2015; Shi et  
175 al., 2017). To test if the reduction in Arl13b seen in our WDR60 KO was caused by a defect in the  
176 transition zone, we labeled KO and WT cilia with known transition zone markers. We found that the

177 core transition zone marker, RPGRIP1L (also known as MKS5), is no longer restricted to an area  
178 adjacent to the mother centriole in WDR60 KO cells (Fig. 5A, quantified in 5Ai). Conversely, TMEM67  
179 (also known as MKS3), which in WT cilia extends from the basal body through a more distal region,  
180 becomes much more tightly restricted to the base of the cilium in WDR60 KO cells (Fig. 5B,  
181 quantified in 5Bi). We also determined the transition zone organization in WDR34 KO cells. The few  
182 cilia found in the WDR34 KO cells recapitulate the same phenotype observed in the WDR60 KO cilia  
183 with an expansion of RPGRIP1L to a more distal position and a reduction of the TMEM67 domain  
184 (Fig. 5A and Fig. 5B). In contrast to TMEM67 and RPGRIP1L, no changes were observed for the  
185 transition zone marker TCTN1 in both WDR34 KO and WDR60 KO cells with respect to the control  
186 (Fig. 5C).

#### 187 *Unregulated entry of Smoothened into cilia following loss of WDR60*

188 Defects in the dynein-2 motor have been previously associated with deregulation of the Shh  
189 pathway (May et al., 2005). Smoothened (Smo), a key component of Shh signaling, localizes to the  
190 cilia in response to Shh stimulation but is normally excluded from cilia in cells that have not been  
191 treated with Shh or an equivalent agonist such as Smoothened agonist (SAG). Unexpectedly, we  
192 found that Smo was localized to cilia in WDR60 KO cells even in the absence of SAG stimulation (Fig.  
193 6A, and 6Ai). This localization did not increase upon agonist treatment. In contrast, Smo was indeed  
194 excluded from cilia in WT cells at steady state (Fig. 6A and 6Ai) but was readily detected within cilia  
195 following SAG stimulation (Fig. 6B, 6Bi, and 6Bii).

#### 196 *Expression of wild-type and patient mutants of WDR60 and WDR34 in KO cells*

197 Many mutations in WDR34 and WDR60 have been associated with SRPs and JATD syndromes. We  
198 engineered selected patient mutations into WDR34 and WDR60 to determine the defect compared  
199 to expression of wild-type proteins. Two WDR60 mutations were selected from one SRPS patient  
200 with compound heterozygosity for WDR60 (WDR60[T749M], WDR60[Q631\*]) and two WDR34  
201 mutations from two patients with JATD syndromes (WDR34[A22V], WDR34[C148F]). The first  
202 WDR60 mutation is located in the third WD repeat (WDR60[T749M]) and the second  
203 (WDR60[Q631\*]) is located just before the WD repeat domain (Fig. S3A). We undertook “rescue”  
204 experiments in which we stably expressed WT or mutant versions of WDR34 and WDR60 in KO cells.  
205 Protein expression of stably transfected WT and HA-WDR60 mutants in WDR60 KO cells is shown in  
206 Fig. 7A. Both WT HA-WDR60 and HA-WDR60[T749M] efficiently rescued defects in the localization of  
207 IFT88 (Fig. 7B). However, expression of HA-WDR60[Q631\*] was unable to restore the basal body  
208 localization of IFT88 (Fig. 7B and 7Bi). Similar data were obtained for the localization of IFT140 (Fig.  
209 7C); expression of both WT and the HA-WDR60[T749M] mutant of WDR60 restored the localization



210 of IFT140 to the base of the cilia, but in cells expressing HA-WDR60[Q631\*], IFT140 was found  
211 throughout the cilium, as it was in WDR60 KO cells. Next, we tried to mimic the compound  
212 heterozygosity occurring in patient cells, generating a stable cell line that expresses both WDR60  
213 [T749M] and [Q631\*] mutants. When the two mutants were co-expressed in the same WDR60 KO  
214 cells we saw no additive effects or dominant negative effects, but cilia appeared normal with IFT88  
215 only localized to the base (Fig. S3B, S3C) as was seen with the HA-WDR60[T749M] mutant.

216 In parallel, we also analyzed the phenotype of WDR34 KO cells stably expressing WT and mutant  
217 forms of WDR34. We found that expression of WT mGFP-WDR34 restored ciliogenesis and axoneme  
218 extension in WDR34 KO cells and that, unexpectedly, this was also true of cells expressing WDR34  
219 incorporating either [A22V] or [C148F] mutations (Fig. 7D and 7Di). These disease-causing mutations  
220 were chosen as they lie in regions without specific domain prediction. The cilia that formed in  
221 WDR34 KO cells expressing either mGFP-WDR34[A22V] or mGFP-WDR34[C148F] were also positive  
222 for Arl13b (Fig. 7D). Moreover, WT and both WDR34 mutants were able to rescue IFT88 localization  
223 to the basal body (Fig. 7E).

224 To better understand the function of WDR60 we analyzed how the complex is assembled by  
225 performing immunoprecipitation of WT and mutant WDR60 proteins. We found that  
226 immunoprecipitation of HA-WDR60 expressed in WDR60 KO cells effectively pulls down the  
227 chaperone NudCD3, known to interact with dynein-2 via its WD repeat domains. As expected,  
228 NudCD3 did not bind to HA-WDR60[Q631\*] lacking the WD repeat domain. WT WDR60 also bound  
229 effectively to WDR34 and, notably, this interaction was very similar with the HA-WDR60[T749M] or  
230 [Q631\*] mutants (Fig. 7F). In contrast, LIC3 is readily detected with WT WDR60 but less so with  
231 WDR60[T749M]; only a very small amount of LIC3 was detected bound to WDR60[Q631\*] (Fig. 7G).  
232 TCTEX1 was found to bind effectively to both WT and HA-WDR60[T749M] but less well to HA-  
233 WDR60[Q631\*] (Fig. 8B). Next, we tested the interactions with IFT proteins, the primary cargo of the  
234 ciliary motors. We found that WT WDR60 can bind to IFT140, IFT88, and IFT57; WDR60[T749M]  
235 binds to all 3 IFT subunits tested but binds less well to IFT140 (Fig. 7H). In contrast, WDR60[Q631\*]  
236 pulled down reduced levels of IFT88 and IFT57 and did not interact with IFT140.

### 237 *The stability of dynein-2 complex in WDR34 and WDR60 KO cells*

238 It has been reported that loss of some components of dynein-2 modifies the stability of the whole  
239 dynein-2 complex. In *Chlamydomonas* depletion or loss of LIC3 (D1bIC2) causes a reduction of DHC2  
240 in whole cells lysate, whereas the expression level of the intermediate chain is less affected (Reck et  
241 al., 2016). Similar results were obtained analyzing expression levels of DHC2 in patients cells with  
242 LIC3 mutations (Taylor et al., 2015). We have shown previously that siRNA depletion of WDR34

243 affects the stability of WDR60 and vice versa (Asante et al., 2014). To determine whether loss of one  
244 intermediate chain had an effect on the stability of the other, we analyzed levels of WDR34 and  
245 WDR60 in whole cells lysate of KO cells. Notably, we found that expression levels of WDR34 were  
246 reduced in WDR60 KO cells, although not completely lost. Correspondingly, there was a reduction of  
247 WDR60 expression levels in WDR34 KO whole cell lysate (Fig. 8A). Next, we sought to determine the  
248 effect of WDR60 and WDR34 loss on the localization of other dynein-2 subunits. We found that LIC3  
249 (DYNC2LI1) localized in cilia of WT cells, but this localization was lost in WDR34 or WDR60 cells (Fig.  
250 8B). DHC2 was detected at the base of the cilia in WT and WDR60 KO cells, but not along the cilia  
251 axoneme. Interestingly, DHC2 localization at the ciliary base was reduced in WDR34 KO cells (Fig.  
252 8C). Moreover, we found that TCTEX1 (DYNC1LT1, Fig. 8D) was enriched at the base of the cilium in  
253 WT cells, with no changes in WDR34 or WDR60 KO cells. To test how the loss of one dynein-2  
254 intermediate chain affected the localization of the other we overexpressed HA-WDR34 and HA-  
255 WDR60 in WDR60 and WDR34 KO cells. Both HA-WDR34 and HA-WDR60 were enriched at the base  
256 and in the cilia axoneme in WT cells (Fig. S4A and Fig. S4B). We observed no changes in the  
257 localization of HA-WDR34 in WDR60 KO cells, which was detected at the base and in the cilia (Fig.  
258 S4B). Surprisingly, HA-WDR60 was greatly enriched in stumpy cilia of WDR34 KO cells compared to  
259 the cilia in WT cells (Fig. S4A). Overexpression of HA-WDR60 could not rescue axoneme elongation in  
260 WDR34 KO cells (Fig. S4C). Additionally, overexpression of HA-WDR34 could not rescue abnormal  
261 IFT88 localization in WDR60 KO cells (Fig. S4D and S4Di).

#### 262 *Defects in dynein-2 holocomplex assembly in absence of WDR34 or WDR60*

263 The results described above suggest a defect in the assembly of the dynein-2 holoenzyme and  
264 therefore we used a proteomic approach to define the assembly of dynein-2. We stably expressed  
265 HA-WDR34 in WT and WDR60 KO cells and HA-WDR60 in WT and WDR34 KO cells and performed  
266 immunoprecipitations using HA-GFP as a control. Confirming that both WDR34 and WDR60 exist in  
267 the same complex, immunoprecipitation analysis showed that in WT cells HA-WDR60 pulls down  
268 WDR34, while HA-WDR34 pulls down WDR60 (Fig. S5A and S5B). Multiplex tandem-mass-tag (TMT)  
269 labeling enabled us to define the interactome of WDR34 in the presence and absence of WDR60 and  
270 of WDR60 in the presence and absence of WDR34. We found that the interactions of HA-WDR34  
271 with dynein-2 components is reduced in WDR60 KO cells compared to WT cells (Fig. 9A). In  
272 particular, loss of WDR60 caused a reduction of DHC2, DYNLRB1, TCTEX1D2, DYNLT1, DYNC2LI1 and  
273 DYNLL2 immunoprecipitated with HA-WDR34 (Fig. 9B and 9Bi) compared to WT cells. Moreover,  
274 interactions of HA-WDR34 with several IFT components and the molecular chaperone NudCD3 were  
275 reduced in WDR60 KO cells. Surprisingly, HA-WDR60 interactions with dynein-2 components were  
276 largely unchanged between WT and WDR34 KO cells (Fig. 9B and 9Bii); dynein-2 components bound

Vuolo et al. *Dynein-2 knockouts define its role in ciliogenesis*.

277 with similar efficiency to HA-WDR60 expressed either in WT and WDR34 KO cells, with a slight but  
278 reproducible reduction in DHC2 and DYNLRB1 binding in WDR34 KO compared to WT cells.  
279

280 Discussion

281 *Structural and functional asymmetry of the dynein-2 motor*

282 Our data provide evidence that the structural asymmetry with the dynein-2 motor is matched by  
283 functional asymmetry. Perhaps most strikingly, we find that WDR34 is essential for axoneme  
284 extension during early steps of ciliogenesis, whereas WDR60 is not required for ciliogenesis. Both  
285 subunits are necessary for maintaining proper cilia protein composition. Depletion of WDR34 using  
286 RNAi is also associated with ciliary defects (Asante et al., 2013) and patient fibroblasts have shorter  
287 cilia with a bulbous tip (Huber et al., 2013). Fibroblasts from WDR34 knockout mice also have  
288 stumpy cilia and defects in Shh signaling (Wu et al., 2017). It is intriguing that some cells missing  
289 WDR34 can still extend a rudimentary cilium but even here, ciliary protein localization is severely  
290 disrupted. Since WDR60 cells can extend an axoneme, WDR34 and WDR60 clearly have distinct but  
291 overlapping functions in cells. We consider that WDR34 plays an essential role in ciliogenesis to  
292 ensure delivery of a key factor required for axoneme extension. It is noteworthy that in the absence  
293 of WDR34, WDR60 can still assemble effectively with the other subunits of dynein-2. While these  
294 interactions are likely reduced compared to the normal situation, this shows that it is specifically  
295 WDR34 that is required at this early stage of ciliogenesis. Our EM data show that it acts at a stage  
296 after docking of the ciliary vesicle, immediately before axoneme extension. Paradoxically, our data  
297 also show that in the absence of WDR60, the dynein-2 holocomplex cannot form effectively yet  
298 axoneme extension occurs normally. This raises the possibility that WDR34 is itself required for  
299 axoneme extension, possibly outside of the context of the dynein-2 complex. We cannot rule out  
300 that there are dynein-2-independent functions of WDR34 and WDR60 but all data provide strong  
301 evidence that they co-exist in the dynein-2 holoenzyme.

302 *Assembly of the dynein-2 holocomplex*

303 In WDR34 and WDR60 KO cells, LIC3 is no longer detected in primary cilia, while TCTEX1 localization,  
304 a dynein light chain that is also a component of dynein-1, was unperturbed. Coupled with our  
305 proteomics data, this suggests that the localization of LIC3 to cilia is a good reporter of dynein-2  
306 assembly. Surprisingly we found that DHC2 levels at the ciliary base are reduced in WDR34 KO cells  
307 compared to WT and WDR60 KO cells. Our data show that in WDR34 KO cells, the remaining  
308 subunits can coassemble into partial dynein-2 complexes. We do not, however, know if this is a  
309 functional or indeed processive motor. According to the current model based on work in *C. elegans*  
310 and *Chlamydomonas*, the dynein-2 complex is transported by the kinesin-2 motor in the anterograde  
311 direction, as a passive cargo, and at the tip it switches direction and it is converted in an active  
312 motor (Chien et al., 2017; Mijalkovic et al., 2017; Pedersen et al., 2006; Toropova et al., 2017;

313 Williamson et al., 2012). Within this model, it is not known how dynein-2 is maintained in an inactive  
314 state during anterograde trafficking. One possibility is that WDR34 might function in the final step of  
315 dynein-2 complex assembly prior to motor activation, potentially at the ciliary tip. Support for this  
316 comes from *C. elegans* where individual dynein-2 proteins show distinct turnaround times within  
317 cilia (Li et al., 2015). It is of course not clear how much of the protein is incorporated within a dynein  
318 complex in these experiments. The tight association of WDR34 with WDR60 and their functional  
319 interdependence (loss of one leading to destabilization of the other) would argue against the  
320 likelihood of dynamic subunit interchange during IFT. Further structural analysis could help resolve  
321 this question. Interaction of WDR60 with WDR34 in our pull-down experiments indicates that each  
322 dynein-2 complex contains both WDR34 and WDR60, in agreement with our own previously  
323 reported data (Asante et al., 2014). Moreover, we found that stably expressed WDR60 could not  
324 rescue ciliogenesis defects in WDR34 KO cells, neither could WDR34 rescue IFT88 localization defects  
325 observed in WDR60 KO cells. Therefore WDR34 and WDR60 are not functionally redundant, at least  
326 in this regard. This supports a model where WDR34 and WDR60 play different roles in ciliogenesis  
327 and in IFT within the context of the dynein-2 complex, likely through different interactions with  
328 distinct components.

#### 329 *Ciliary trafficking defects in absence of WDR34 and WDR60*

330 Loss of either WDR34 or WDR60 leads to IFT particle accumulation at the base of as well as within  
331 cilia. We found that loss of WDR60 results in an increase of IFT-B proteins, IFT20, IFT57, and IFT88,  
332 not only at the tip but also close to the cilia base. This suggests that IFT-B proteins could be retained  
333 at the basal body or around the transition zone. Consistent with these results, mutations in IFT-A or  
334 dynein-2 in mice also result in abnormal accumulation of IFT particles near the base of the cilium  
335 (Goggolidou et al., 2014; Liem et al., 2012; Ocbina et al., 2011). This has been linked to defects in the  
336 export of ciliary cargo across the transition zone (He et al., 2017). Similar defects are seen following  
337 disruption of the heavy chain, DHC2 (Hou and Witman, 2015).

338 In addition to defects in retrograde IFT, incomplete assembly of dynein-2 in WDR60 KO cells could  
339 cause a block in IFT train assembly and impaired entry of cargo into cilia. Indeed, work in *C. elegans*  
340 has shown that IFT-B is required for entry of dynein-2 into cilia (Yi et al., 2017). In addition to these  
341 defects, we show that KAP3, a subunit of kinesin-2, accumulates at the ciliary tip of WDR60 KO cells.  
342 This would decrease the levels of kinesin-2 available to load onto departing anterograde trains and  
343 further cause accumulation of IFT particles at the base. This might also reflect some functional  
344 coupling of dynein-2 and kinesin-2 in the assembly of anterograde IFT particles. This phenotype  
345 might be exacerbated because those IFT-B particles that do enter become stuck at the ciliary tips in

Vuolo et al. *Dynein-2 knockouts define its role in ciliogenesis.*

346 WDR60 KO cells because of defects in retrograde IFT. Notably, our data are also consistent with  
347 models where, in metazoa, kinesin-2 motors are returned to the ciliary base by dynein-2-dependent  
348 retrograde IFT (Broekhuis et al., 2013; Chien et al., 2017; Mijalkovic et al., 2017; Prevo et al., 2015;  
349 Signor et al., 1999; Williams et al., 2014) but contrasts with *Chlamydomonas* where kinesin-2  
350 diffuses back to the cilia base (Engel et al., 2012). Overall, our data support models where dynein-2  
351 acts both in loading of cargo into cilia and in exit from cilia.

352 These findings suggest a complex interplay between IFT particles and IFT motors to control entry to  
353 and exit from cilia. Notably, interfering with either dynein-2 or IFT results in perturbation of  
354 transition zone organization, IFT, and ciliary membrane protein localization (Garcia-Gonzalo and  
355 Reiter, 2017).

356 *Dynein-2 is required for transition zone composition*

357 The transition zone is the ciliary region most proximal to the mother centriole and it functions as a  
358 gate, acting as a diffusion barrier to prevent unregulated entry of high molecular weight proteins  
359 and maintaining the protein composition of the ciliary membrane (Garcia-Gonzalo and Reiter, 2017;  
360 Jensen and Leroux, 2017). Our results show that loss of either dynein-2 intermediate chain disrupts  
361 the organization of the ciliary transition zone. The defect is clearly very significant since we observe  
362 accumulation of intraciliary vesicles within the cilia of WDR60 KO cells that would normally be  
363 excluded by the diffusion barrier. The presence of intraciliary vesicles could also indicate the  
364 formation of ectosomes to remove excess membrane from the cilia. Such vesicles have been  
365 described in motile cilia (Shah et al., 2008) and in mouse photoreceptor cells (Gilliam et al., 2012)  
366 from BBS mutants, as well as in wild-type zebrafish (Goetz et al., 2014). However, we always see  
367 accumulated membrane at the tip of cilia in WDR60 KO cells when imaging living cells expressing  
368 ciliary membrane markers and have not detected any shedding of vesicles during such experiments.  
369 This suggests that any mechanisms to reduce membrane accumulation might not be able to  
370 overcome any defect in retrograde IFT. The presence of intraciliary vesicles in WDR60 KO cells is  
371 entirely consistent with a significant defect in the diffusion barrier and/or gated entry mechanisms.  
372 The role of dynein-2 in maintaining transition zone composition is also consistent with the fact that  
373 LIC3 and overexpressed WDR34 and WDR60 localize at the transition zone in RPE1 cells. Moreover,  
374 in a previous study, active phosphorylated TCTEX1 has been detected at the transition zone of neural  
375 progenitors (Li et al., 2011). Changes in transition zone composition are associated with a reduced  
376 localization of soluble and membrane proteins in the cilia (Berbari et al., 2008b; Chih et al., 2011).  
377 5HT6, SSTR3, and Arl13B are all reduced in abundance within cilia of WDR60 KO cells, suggesting  
378 that these proteins might not be effectively retained within cilia, but leak out through the diffusion

379 barrier. An alternative, as discussed above, is that these proteins are less effectively loaded into cilia.  
380 We did not find a difference in the intensity levels of overexpressed Rab8a in WDR60 KO compared  
381 to WT cells suggesting that at least some proteins can enter normally. It seems likely that the defects  
382 we see in both entry to, and exit from, cilia in these KO cells are caused by defects in transition zone  
383 structure.

#### 384 *Dynein-2 dysfunction and disease*

385 The list of mutations causing disease in genes associated with primary cilia is continuously  
386 expanding. Our results show that Smo localization is deregulated in the absence of WDR60. Smo is  
387 thought to enter cilia continuously but rapidly exit in the absence of ligand. Our data are consistent  
388 with this, with loss of WDR60 results in aberrant accumulation of Smo in cilia and likely to perturbed  
389 hedgehog signaling. Interestingly, abnormal accumulation of Smo in the cilia has also been observed  
390 in mouse fibroblasts with mutations in DHC2. In these mutants mice inactivation of dynein-2 causes  
391 loss of Shh signaling and midgestation lethality (Ocbina et al., 2011). Given the links between  
392 hedgehog signaling and skeletogenesis, this is likely to be a major cause of the phenotypes seen on  
393 loss-of-function of dynein-2 in animal models and in patients (Dagoneau et al., 2009; Li et al., 2015;  
394 May et al., 2005; Wu et al., 2017).

395 In this study, we also characterized the function of dynein-2 using disease-causing mutations found  
396 in SRPs and JATD syndromes. Using mutagenesis to recreate patient mutations WDR60[Q631\*] and  
397 WDR60[T749M], we show that the N-terminal region of WDR60 is sufficient to bind to WDR34 and  
398 TCTEX1 but not to LIC3. This suggests some assembly of a WDR34-WDR60 module prior to full  
399 complex assembly. Further analysis of patient mutation [Q631\*] reveals that the C-terminal  $\beta$ -  
400 propeller domain of WDR60 is required for binding of the IFT-B proteins, including IFT88. The  
401 observed reduction in binding between the WDR60[Q631\*] mutant and NudCD3 is expected as the  
402 NudC family acts as co-chaperones with hsp90 for folding of  $\beta$ -propellers such as WD repeat  
403 domains (Taipale et al., 2014). In contrast, WDR60[T749M] binds to other dynein-2 proteins, IFT  
404 proteins, and NudCD3. The reduction in binding to LIC3 seen with this mutation suggests that less  
405 efficient dynein-2 assembly might contribute to the patient phenotypes.

406 Surprisingly, expression of WT and WDR34[A22V] or [C148F] mutants in WDR34 KO cells was able to  
407 rescue both normal cilia length and normal IFT88 localization at the cilia base. Genome sequencing  
408 data showed that patients with WDR34[A22V] mutation also present mutations in DYNC2H1 and  
409 IFT140 (Schmidts et al., 2013b), similarly, a second mutation in the WDR34 gene was found in  
410 patients with [C148F] mutant. Thus, it is possible that these two mutant proteins are not sufficient to

Vuolo et al. *Dynein-2 knockouts define its role in ciliogenesis.*

411 impair dynein-2 function themselves and exclusively cause a deleterious effect when a second  
412 modification is also present.

413 Our data show that not only is dynein-2 required for retrograde IFT but also to build and maintain a  
414 functional diffusion barrier at the base of the cilium. Our data do not discriminate between roles in  
415 assembly versus maintenance of the transition zone. Other recent work has shown that Joubert  
416 syndrome is caused by disruption of the transition zone (Shi et al., 2017). Joubert syndrome leads to  
417 severe neurological effects that are underpinned by developmental defects in hedgehog signaling.  
418 Jeune syndrome is characterized by skeletal defects but these are attributed to hedgehog signaling  
419 defects. Together our work and that of Shi et al. (2017) suggests that defects in transition zone  
420 architecture and resulting defects in developmental signaling might define a common root cause of  
421 both Joubert and Jeune syndromes, and indeed perhaps other ciliopathies.

422



423 Acknowledgements

424 We would like to thank Katharine Risk, Beth Moyse, and Imogen Binnian for their contributions to  
425 the work and Janine McCaughey for helpful discussion on this work. Thanks also to Max Nachury and  
426 Jackie Goetz for helpful comments. This work was supported by grants from the BBSRC  
427 (BB/N000420/1) and MRC (MR/P000177/1 and MR/K018019/1). We would like to thank the Wolfson  
428 Bioimaging Facility for support of the microscopy experiments. Confocal microscopy was supported  
429 by a BBSRC ALERT 13 capital grant (BB/L014181/1).

430 The authors declare no competing financial interests.

431 Author contributions: DJS, LV, and NLS conceived and designed the experiments and wrote the  
432 manuscript. LV and NJS performed the experiments and analyzed the data. KJH helped design and  
433 conducted the proteomics experiments and data analysis.

434

## 435 Materials and Methods

436 All reagents were purchased from Sigma-Aldrich (Poole, UK) unless stated otherwise.

437 *Plasmids, cloning, and mutagenesis.*

438 The human WDR34 gene was obtained from the Origene (SC319901, Cambridge Bioscience), human  
439 WDR60 was generated by gene synthesis (Life Technologies, Paisley, UK). An HA tag for WDR34 and  
440 WDR60 was added by PCR and both proteins were subcloned in the pLVX-puro vector. Mutant  
441 [T749M WDR60] was generated by site-directed mutagenesis PCR using the primers: Fw: 5'-  
442 CAGAACCGCCatgTTCTCCACC-3' and Rv 5'-GGTGGAGAACATGGCGGTTCTG-3' changing codon ACG  
443 (Threonine) to ATG (Methionine). WDR60 [Q631\*] mutant was constructed by site-directed  
444 mutagenesis using the primers: Fw: 5'-GATAGCAGCTCctagCTGAATACC-3' and 5'-  
445 GGTATTCAGCTAGGAGCTGCTATC-3' changing codon CAG (Glutamine) to TAG (STOP codon). For  
446 WDR34, the A22V mutant was generated by changing codon GCG (Alanine) to GTC (Valine) using  
447 oligonucleotides 5'-TGCGGCGCTGtgACAGTCGGG-3' and 5'-ACACCAGCGCTTCCCGCTG-3'. The  
448 C148F mutation was generated by changing codon TGT (Cysteine) to TTT (Phenylalanine) using  
449 oligonucleotides 5'-GATGGTGTCTtttCTGTATACCCTGGG-3' and 5'-TGCTGCTGCTCGGTCCAG-3'. All  
450 constructs were validated by DNA sequencing.

451 Mouse L13-Arl13b-GFP was a gift from Tamara Caspary (Addgene plasmid # 40879, (Larkins et al.,  
452 2011)), IFT20-GFP ((Follit et al., 2006), plasmid JAF2.13) was a gift from Gregory Pazour (Addgene  
453 plasmid # 45608). pEGFPN3-SSTR3 and pEGFPN3-5HT6 were gifts from Kirk Mykytyn (Addgene  
454 plasmid #35624 and #35623, (Berbari et al., 2008a)), EGFP-Rab8 was a gift from Johan Peränen  
455 (University of Helsinki).

456 *Cell culture*

457 Human telomerase-immortalized retinal pigment epithelial cells (hTERT-RPE-1, ATCC CRL-4000) were  
458 grown in DMEM-F12 supplemented with 10% FBS (Life Technologies, Paisley, UK) at 37°C under 5%  
459 CO<sub>2</sub>. Cells were not validated further after purchase from ATCC. Transient transfections of Arl13b-  
460 GFP, SSTR3-GFP, 5HT6-GFP, and Rab8-GFP were performed using Lipofectamine 2000 (Life  
461 Technologies, Paisley, UK) according to the manufacturer's protocol. Lentiviral particles for each of  
462 the stable RPE-1 cell lines were produced in HEK293T cells using the Lenti-X™ HTX Packaging  
463 System (Clontech, Saint-Germain-en-Laye, France). Low passage hTERT-RPE1 cells were transduced  
464 with the resultant viral supernatant, strictly according to the manufacturer's directives and at 48 h  
465 post-transduction, cells were subcultured in presence of 5 µg/ml puromycin. RPE-1 cells were  
466 incubated in serum-free medium for 24 h to induce ciliogenesis. Confluent cells were placed in

467 serum-free media and treated with Shh agonist SAG (Selleckchem (from Stratech Scientific, Ely, UK)  
468 Catalog No.S7779) at the final concentration of 100 nM for 24 h.

#### 469 *Genome engineering*

470 The guide RNAs (gRNA) targeting WDR34 were designed using 'chop chop' software (Labun et al.,  
471 2016) or using CRISPR design <http://crispr.mit.edu/> for designing WDR60 gRNA (Hsu et al., 2014).  
472 pSpCas9(BB)-2A-GFP (Addgene plasmid, #PX458) was used as the vector to generate a gRNA. The  
473 gRNA sequences (5'- A GCC TTT CTT CGG AGA GTG G-3'; and 5'-CA GGT GTC TTG TCT GTA TAC -3')  
474 were designed to target Exon2 and Exon3 of human WDR34. Similarly, the gRNA (5'-AG GTG CAG  
475 GGA TCC CGA CCA-3') was designed to target exon 3 of WDR60. RPE-1 cells were transfected with 1  
476 µg of pSpCas9(BB)-2A-GFP. After 48 h GFP-positive cells were sorted, and singles cells were plated in  
477 a 96 well plate. To check the WDR34 and WDR60 genes, genomic DNAs of the target sequences were  
478 extracted and subjected to PCR. Subsequently, the PCR products were cloned in the pGEM® T Easy  
479 vector according to the manufacturer's instructions and sequenced. In three cells clones, identified  
480 as WDR34 KO#1, WDR34 KO#2 and WDR60 KO, small deletions/insertions causing a frameshift were  
481 detected in both alleles (Supplementary Fig. 1 for details). On the contrary, the cell clones identified  
482 as CRISPR CTRL WDR34 and WDR60 cells, transfected and treated in the same conditions of our  
483 knock out clones, did not show any mutation in the targeted genomic DNA region.

#### 484 *Antibodies*

485 The antibodies used, and their dilutions for western blotting (WB) and immunofluorescence (IF) are  
486 as follows: Acetylated tubulin (Sigma (Poole, UK) T6793 1:2000 for IF), rabbit anti-HA (Cell Signaling  
487 Technologies (New England Biolabs, Hitchin, UK) 1:2000 WB, 1:1000 IF), rabbit IFT88 (Proteintech  
488 (Manchester, UK) 13967-1-AP, 1:200 WB, 1:300 IF), rabbit anti-IFT140 (Proteintech 17460-1-AP,  
489 1:200, WB 1:100 IF), rabbit anti-IFT57 (Proteintech 11083-1,-AP 1:200, WB 1:100 IF), rabbit anti-  
490 IFT43 (Proteintech 24338-1-AP, 1:50 IF), anti-IFT20 (Proteintech 13615-1-AP, 1:200 IF), anti-TMEM67  
491 (proteintech13975-1-AP, 1:50 IF), anti-RPGRIP1L (Proteintech 55160-1-AP, 1:100 IF), anti-DYNC2HC1  
492 (Proteintech 55473-1-AP, 1:100 IF), rabbit anti-LIC3 (Proteintech 15949-1-AP, 1:250 WB, 1:100 IF),  
493 rabbit anti-TCTEX1 (Santa Cruz Biotechnology (from Insight Biotechnology, Wembley, UK) sc-28537,  
494 1:200 WB, 1:100 IF), rabbit anti-Arl13B (Proteintech 17711-1AP, 1:1000 IF), rabbit anti-TCTN1  
495 (Proteintech 15004-1-AP, 1:100 IF), rabbit anti-Smo (Abcam (Cambridge, UK) ab38686, 1:100 IF ),  
496 Sheep anti-Myc ((Fan et al., 2010) kindly provided by Harry Mellor, University of Bristol), rabbit anti-  
497 WDR60 (Novus Biologicals (from Bio-Techne Abingdon, UK) NBP1-90437 1:300 WB in Fig.9), rabbit  
498 anti-WDR60 (Sigma HPA021316, 1:300 WB in Fig. S2 and Fig.S5), rabbit anti-WDR34 (Novus  
499 NBP188805, 1:300 WB), mouse anti-GAPDH (Abcam ab9484, 1:1000 WB), p150 glued (BD 6127009,

500 1:1000 WB), LIS1 (Bethyl A300-409A, 1:1000 WB), dic74 (MAB1618 Millipore (Watford, UK), 1:1000  
501 WB), NUDCD3 (Sigma HPA019136, 1:350 WB).

#### 502 *Immunofluorescence*

503 Cells grown on 0.17 mm thick (#1.5) coverslips (Fisher Scientific, Loughborough, UK) were washed in  
504 PBS, and then fixed for 10 min in PFA and permeabilized with PBS containing 0.1% Triton X-100 for 5  
505 min. Alternatively, cells were fixed in ice-cold methanol at  $-20^{\circ}\text{C}$  for 5 min for TMEM67, RPGRIP1L,  
506 TCTN1, DYNC2H1 and IFT20 staining.

507 For TCTEX1 immunolabelling, cells were washed twice with pre-warmed cytoskeletal buffer (CB,  
508 containing 100 mM NaCl 300 mM sucrose, 3 mM  $\text{MgCl}_2$ , and 10 mM PIPES) and fixed for 10 min in  
509 CB-PFA, as described previously (Hua and Ferland, 2017). Subsequently, cells were blocked using 3%  
510 BSA in PBS for 30 min at room temperature. The coverslips were incubated with primary antibodies  
511 for 1 h at room temperature, washed in PBS and then incubated with secondary antibodies for  
512 another 1 h at room temperature. Nuclear staining was performed using DAPI [4,6-diamidino-2-  
513 phenylindole (Life Technologies), diluted at 1:5000 in PBS] for 3 min at room temperature, and the  
514 cells were then rinsed twice in PBS. Cells were imaged using an Olympus IX-71 or IX-81 widefield  
515 microscope with a 63x objective, and excitation and emission filter sets (Semrock, Rochester, NY)  
516 controlled by Volocity software (version 4.3, Perkin-Elmer, Seer Green, UK). Alternatively, cells in Fig.  
517 4 and Fig. 7 were imaged using Leica SP5 confocal microscope (Leica Microsystems, Milton Keynes,  
518 UK). Live images in Fig. 3 were imaged using Leica SP8. All images were acquired as 0.5  $\mu\text{m}$  z-stacks.  
519 All graphs show mean and standard deviation.

#### 520 *Rescue experiments*

521 For 'rescue' experiments, stable WDR60 KO cell lines overexpressing wild-type and mutants HA-  
522 tagged WDR60 were generated. Similarly, WDR34 KO#1 cells were stably transfected with WT and  
523 mutants WDR34 tagged with a GFP. Cells were serum starved for 24 h, fixed and processed for  
524 immunofluorescence analysis.

#### 525 *Electron microscopy*

526 Cells were serum starved 24 h and fixed in 2.5% glutaraldehyde for 20 min. Next, the cells were  
527 washed for 5 min in 0.1 M cacodylate buffer then post-fixed in 1%  $\text{OsO}_4$ /0.1 M cacodylate buffer for  
528 30 min. Cells were washed 3x with water and stained with 3% uranyl acetate for 20 min. After  
529 another rinse with water, cells were dehydrated by sequential 10 min incubations with 70, 80, 90,  
530 96, 100 and 100% ethanol before embedding in Epon™ at  $70^{\circ}\text{C}$  for 48 h. Thin (70 nm) serial sections  
531 were cut and stained with 3% uranyl acetate then lead citrate, washing 3x with water after each.

532 Once dried, sections were imaged using an FEI (Cambridge, UK) Tecnai12 transmission electron  
533 microscope.

#### 534 *Immunoblotting*

535 Cells were lysed in buffer containing 50 mM Tris pH7.5, 150 mM NaCl, 1% Igepal and 1 mM EDTA.  
536 Samples were separated by SDS-PAGE followed by transfer to nitrocellulose membranes.  
537 Membranes were blocked in 5% milk-TBST. Primary antibodies diluted in blocking buffer were  
538 incubated with membrane overnight and detected using HRP-conjugated secondary antibodies  
539 (Jackson ImmunoResearch, West Grove, PA) and enhanced chemiluminescence (GE Healthcare,  
540 Cardiff, United Kingdom).

#### 541 *Fluorescence intensity measurement*

542 Quantification of fluorescence intensity was performed using original images. Measurement of  
543 intensity was performed using the average projections of acquired z-stacks of the area of the ciliary  
544 marker acetylated tubulin. Fluorescence intensity along the ciliary axoneme was measured using  
545 ImageJ plot profile tool. Fluorescence intensity in at the ciliary base was measured drawing same  
546 diameter circles at the ciliary base.

#### 547 *Immunoprecipitation*

548 RPE-1 cells expressing the indicated cDNA constructs were washed with PBS and incubated with the  
549 crosslinker solution (1 mM DSP, Thermo Fisher Scientific #22585) for 30 min on ice. The reaction was  
550 quenched by adding 500 mM Tris-HCl pH 7.5 for 15 min. Cells were washed twice with PBS and lysed  
551 in a buffer containing 50 mM Tris/HCl, pH 7.4, 1 mM EDTA, 150 mM NaCl, 1% Igepal and protease  
552 inhibitors (539137, Millipore). Subsequently, cells were incubated on a rotor at 4°C for 30 min and  
553 then lysates were centrifuged at 13,000 g at 4°C for 10 min. Cell lysates were added to the  
554 equilibrated anti-HA-Agarose beads (Sigma A2095, batch number 026M4810V) and incubated on a  
555 rotor at 4°C. Next, the beads were washed three times by centrifuging at 2000 g for 2 min at 4°C with  
556 1 ml of washing buffer (50 mM Tris-HCl, 150 mM NaCl, 0.5 mM EDTA, Triton X-100 0.3% SDS 0.1%)  
557 containing protease inhibitors (539137, Millipore). Samples used for SDS-PAGE and immunoblotting  
558 were resuspended in 50 µl of LDS sample buffer (Life Technologies) containing sample reducing  
559 agent (Life Technologies) and boiled at 95°C for 10 min.

#### 560 *Proteomic analysis*

561 For TMT Labelling and high pH reversed-phase chromatography, the samples were digested from the  
562 beads with trypsin (2.5 µg trypsin, 37°C overnight), labeled with Tandem Mass Tag (TMT) six-plex  
563 reagents according to the manufacturer's protocol (Thermo Fisher Scientific, Loughborough, UK) and

564 the labeled samples pooled. The pooled sample was then desalted using a SepPak cartridge  
565 according to the manufacturer's instructions (Waters, Milford, Massachusetts, USA)). Eluate from  
566 the SepPak cartridge was evaporated to dryness and resuspended in buffer A (20 mM ammonium  
567 hydroxide, pH 10) prior to fractionation by high pH reversed-phase chromatography using an  
568 Ultimate 3000 liquid chromatography system (Thermo Fisher Scientific). In brief, the sample was  
569 loaded onto an XBridge BEH C18 Column (130 Å, 3.5 µm, 2.1 mm X 150 mm, Waters, UK) in buffer A  
570 and peptides eluted with an increasing gradient of buffer B (20 mM ammonium hydroxide in  
571 acetonitrile, pH 10) from 0-95% over 60 min. The resulting fractions were evaporated to dryness and  
572 resuspended in 1% formic acid prior to analysis by nano-LC MSMS using an Orbitrap Fusion Tribrid  
573 mass spectrometer (Thermo Fisher Scientific).

#### 574 *Nano-LC Mass Spectrometry*

575 High pH RP fractions were further fractionated using an Ultimate 3000 nano-LC system in line with  
576 an Orbitrap Fusion Tribrid mass spectrometer (Thermo Fisher Scientific). In brief, peptides in 1%  
577 (vol/vol) formic acid were injected onto an Acclaim PepMap C18 nano-trap column (Thermo Fisher  
578 Scientific). After washing with 0.5% (vol/vol) acetonitrile 0.1% (vol/vol) formic acid, peptides were  
579 resolved on a 250 mm × 75 µm Acclaim PepMap C18 reverse phase analytical column (Thermo Fisher  
580 Scientific) over a 150 min organic gradient, using 7 gradient segments (1-6% solvent B over 1 min., 6-  
581 15% B over 58 min., 15-32% B over 58 min., 32-40% B over 5 min., 40-90% B over 1 min., held at 90%  
582 B for 6 min and then reduced to 1% B over 1 min.) with a flow rate of 300 nl min<sup>-1</sup>. Solvent A was  
583 0.1% formic acid and Solvent B was aqueous 80% acetonitrile in 0.1% formic acid. Peptides were  
584 ionized by nano-electrospray ionization at 2.0 kV using a stainless steel emitter with an internal  
585 diameter of 30 µm (Thermo Fisher Scientific) and a capillary temperature of 275°C.

586 All spectra were acquired using an Orbitrap Fusion Tribrid mass spectrometer controlled by Xcalibur  
587 2.0 software (Thermo Fisher Scientific) and operated in data-dependent acquisition mode using an  
588 SPS-MS3 workflow. FTMS1 spectra were collected at a resolution of 120 000, with an automatic gain  
589 control (AGC) target of 400 000 and a max injection time of 100 ms. Precursors were filtered with an  
590 intensity range from 5000 to 1E20, according to charge state (to include charge states 2-6) and with  
591 monoisotopic precursor selection. Previously interrogated precursors were excluded using a  
592 dynamic window (60 s +/- 10 ppm). The MS2 precursors were isolated with a quadrupole mass filter  
593 set to a width of 1.2 m/z. ITMS2 spectra were collected with an AGC target of 10 000, max injection  
594 time of 70 ms and CID collision energy of 35%.

595 For FTMS3 analysis, the Orbitrap was operated at 30 000 resolution with an AGC target of 50 000  
596 and a max injection time of 105 ms. Precursors were fragmented by high energy collision

597 dissociation (HCD) at a normalized collision energy of 55% to ensure maximal TMT reporter ion yield.  
598 Synchronous Precursor Selection (SPS) was enabled to include up to 5 MS2 fragment ions in the  
599 FTMS3 scan.

600 *Data Analysis*

601 The raw data files were processed and quantified using Proteome Discoverer software v2.1 (Thermo  
602 Fisher Scientific) and searched against the UniProt Human database (140000 entries) and GFP  
603 sequence using the SEQUEST algorithm. Peptide precursor mass tolerance was set at 10 ppm, and  
604 MS/MS tolerance was set at 0.6 Da. Search criteria included oxidation of methionine (+15.9949) as a  
605 variable modification and carbamidomethylation of cysteine (+57.0214) and the addition of the TMT  
606 mass tag (+229.163) to peptide N-termini and lysine as fixed modifications. Searches were  
607 performed with full tryptic digestion and a maximum of 1 missed cleavage was allowed. The reverse  
608 database search option was enabled and the data was filtered to satisfy false discovery rate (FDR) of  
609 5%.  
610

611 Figure Legends

612 *Figure 1: Role of dynein-2 intermediate chains WDR34 and WDR60 in ciliogenesis.*

613 (A) Cilia stained with the markers Arl13b (green) and acetylated tubulin (AcTub, red) in RPE1 WDR60  
614 and WDR34 KO cell lines. Scale bars 5µm. (B) Percentage of ciliated cells (n=3; 656 WT, 430 WDR34  
615 KO#1, 296 WDR34 KO#2, 397 WDR34 KO CTRL, 343 WDR60 KO and 195 WDR60 KO CTRL cells  
616 quantified). (C) Cilia length in WDR60 and WDR34 KO compared with WT cells and CRISPR control  
617 cells lines (n=3; 120 WT, 158 WDR60 KO, 138 WDR60 KO CTRL and 30 WDR34#1 cells quantified).  
618 Mann-Whitney test was used, p-value: \*\*\*\*=<0.0001. (D- Hi) Representative 70 nm thick EM  
619 sections of (D) WT, (E) WDR34 KO and (F, G- Hi) WDR60 KO cilia. (E) Six serial sections through a  
620 WDR34 KO cilium showing no axoneme extension. (G) Two serial sections through a WDR60 KO  
621 cilium showing. Arrows point to the bulbous ciliary tip and to a membrane protrusion containing  
622 membrane vesicles; enlargements are shown to the right (H and Hi). Scale bar length and  
623 magnification is indicated on the images.

624

625 *Figure 2: WDR34 and WDR60 are essential for IFT-B trafficking in primary cilia.*

626 (A, B) Localization of (A) IFT88 and (B) IFT57 in WT, WDR60 KO, and WDR34 KO#1 cells. Line graphs  
627 show lines scans of IFT intensity along the length of a representative cilium from WT (Ai and Bi,  
628 green), WDR60 KO (Aii and Bii, orange) and WDR34 KO (Aiii and Biii, yellow) cells. (C, D)  
629 Quantification of IFT-B localization within cilia in WT and WDR60 KO cells (C, IFT88 102 WT and 101  
630 WDR60 cells quantified; D, IFT57 106 WT and 98 WDR60 KO cells quantified; n=3 independent  
631 experiments). Mann-Whitney test was used, p-value: \*\*\*\*=<0.0001. (E) Endogenous IFT20  
632 accumulates at the ciliary tip in WDR60 KO cells. (F) Quantification of IFT20 localization within cilia in  
633 WDR60 KO cells (n=3 independent experiments, 102 WT and 100 WDR60 KO cells quantified). (G)  
634 Localization of IFT20-GFP in WT and WDR60 KO fixed cells. Scale bar, all panels = 5 µm. Arrows point  
635 to the ciliary base.

636

637 *Figure 3: IFT-A trafficking defects in absence of WDR34 and WDR60.*

638 (A-B) Localization of IFT-A proteins (A) IFT140 and (B) IFT43 in WT, WDR60 KO, and WDR34 KO#1  
639 cells. Line graphs show lines scans of IFT intensity along the length of a representative cilium from  
640 WT (Ai and Bi, green), WDR60 KO (Aii and Bii, orange) and WDR34 KO (Aiii and Biii, yellow) cells. (C)  
641 Quantification of IFT140 intensity within cilia in WT and WDR60 KO cells (n=3, 186 WT and 166  
642 WDR60 KO cells quantified). (D) Quantification of the number of IFT43 positive cilia from WT and



Vuolo et al. *Dynein-2 knockouts define its role in ciliogenesis.*

643 WDR60 KO cells (n=3, 271 WT and 203 WDR60 KO cells quantified). (C-D) Mann-Whitney test was  
644 used, p-value: \*\*\*\*= $<0.0001$ . (E) Localization of KAP3A in WT, WDR60 KO, and WDR34 KO cells.  
645 Scale bars = 5 $\mu$ m. Arrows point to the ciliary base.

646

647 *Figure 4: WDR60 is crucial for the composition of cilia membrane proteins.*

648 (A and B) Single frame images are taken from live imaging movies of WT and WDR60 KO cells  
649 overexpressing EGFP-SSTR3 and GFP-Arl13b. (C-F) Fixed cell staining of overexpressed Arl13b-GFP,  
650 EGFP-SSTR3, EGFP-5HT6, and EGFP-Rab8a in WT and WDR60 KO cells. (Ci-Fi) Intensity quantification  
651 of the overexpressed protein indicated (Arl13b-GFP n=3, 56 WT and 50 WDR60 KO cells quantified;  
652 EGFP-SSTR3 n=3, 80 WT and 50 WDR60 KO cells quantified; EGFP-5HT6 n=3, 50 WT and 51 WDR60  
653 KO cells quantified; EGFP-Rab8a n=3, 51 WT, and WDR60 50 KO cells quantified). Mann-Whitney test  
654 was used, p-value: \*\*\*\*= $<0.0001$ . Scale bars 5 $\mu$ m.

655

656 *Figure 5: Dynein-2 is important for transition zone assembly.*

657 (A-C) Localization of RPGRIP1L, TMEM67, and TCTN1 in WT and KO cells. (Ai and Bi) Percentage of  
658 RPGRIP1L and TMEM67 positive cilia. RPGRIP1L n=3, 188 WT and 272 WDR60 KO cells quantified;  
659 TMEM67 n=3, 359 WT and 243 WDR60 KO cells quantified. Mann-Whitney test was used p-value:  
660 \*\*\*\*= $<0.0001$ . Scale bars 5 $\mu$ m. Arrows point to the ciliary base.

661

662 *Figure 6: Loss of WDR60 affects Smo localization in the cilia*

663 (A and B) Immunofluorescence of WT and WDR60 KO cells in presence or absence of SAG and  
664 stained for Smo (green), AcTub (red), and DAPI (blue). (Ai and Bi) Percentage of Smo positive cilia in  
665 SAG untreated (n=3, 148 WT and 120 WDR60 KO cells quantified) and treated cells (n=3, 670 WT and  
666 580 WDR60 KO cells quantified). (Bii) Quantification of the total intensity of ciliary Smo labeling in  
667 cells treated with SAG (n=3, 102 WT and 82 WDR60 KO cells quantified). Mann-Whitney test was  
668 used, p-value: \*\*\*\*= $<0.0001$ . Scale bars 5 $\mu$ m.

669

670 *Figure 7: WDR34 and WDR60 KO rescue experiments.*

671 (A) Immunofluorescence staining of HA (green) in WDR60 KO cell lines stably expressing HA-tagged  
672 WT and mutant WDR60 constructs. (B and C) IFT88 or IFT140 staining (green) with AcTub labeling

Vuolo et al. *Dynein-2 knockouts define its role in ciliogenesis.*

673 (red) of the stable cell lines shown in A as well as WT cells. (Bi) Total intensity quantification of IFT88  
674 labeling across the length of primary cilia in each cell line (n=3; 97 WT, 125 WDR60 KO, 202 WDR60  
675 KO+ HA-WDR60, 119 WDR60 KO+ HA-WDR60 [T749M], 150 WDR60 KO+ HA-WDR60 [Q631\*] cells  
676 quantified). (Ci) Total intensity quantification of IFT140 labeling across the length of primary cilia in  
677 each cell line (n=3; 168 WT, 164 WDR60 KO, 63 WDR60 KO+ HA-WDR60, 56 WDR60 KO+ HA-WDR60  
678 [T749M], 71 WDR60 KO+ HA-WDR60 [Q631\*] cells quantified). (D and E) WDR34 KO#1 cells stably  
679 expressing mGFP-tagged WT and mutant WDR34. (D) Primary cilia staining with Arl13b (red) and  
680 AcTub (blue). (Di) Percentage of ciliated cells (n=3; 357 WT, 430 WDR34 KO, 399 WDR34 KO + mGFP-  
681 WDR34, 383 WDR34 KO + mGFP-WDR34 [A22V], 432 WDR34 KO + mGFP-WDR34[C148F] cells  
682 quantified). (E) IFT88 staining in WT, WDR34 KO#1 cells, and WDR34 KO#1 cells expressing GFP-  
683 tagged WT and mutant WDR34. One-way ANOVA followed by Kruskal-Wallis test was used p-value:  
684 \*\*\*\*= $<0.0001$ . Arrows point to the ciliary base. (G-H) Immunoprecipitation of HA-tagged GFP, WT,  
685 WDR60 [T749M] and HA-WDR60 [Q631\*] mutant proteins followed by immunoblot for (F) HA,  
686 NudCD3, and GAPDH; (G) WDR34, LIC3, and TCTEX1 and (H) IFT140, IFT88, and IFT57.

687

688 *Figure 8: Dynein-2 assembly in primary cilium.*

689 (A) Immunoblotting for WDR60 and WDR34 in WT, WDR34 KO#1 and WDR60 KO cells. (B) LIC3  
690 localization in the cilia of WT, WDR34 KO#1 and WDR60 KO cells. (C) DHC2 localization at the ciliary  
691 base in WT and KO cells. (Ci) Intensity quantification shows a reduction of DHC2 at the ciliary base in  
692 WDR34 KO#1 cells (n=3, 120 WT, 106 WDR60 KO and 71 WDR34 KO #1 cells quantified). (D) TCTEX1  
693 localizes at the ciliary base in WT and KO cells (n=3 115 WT, 85 WDR60 KO, and 50 WDR34 KO#1  
694 cells quantified). Mann-Whitney test ,p-value: \*\*\*\*= $<0.0001$ . Scale bars 5 $\mu$ m. Arrows point to the  
695 ciliary base.

696

697 *Figure 9: Proteomics of HA-WDR34 and HA-WDR60 interactomes in knockout cell lines.*

698 Abundance ratios in WT/ WDR34 KO cells expressing HA-WDR60 and WT/ WDR60 KO cells  
699 expressing HA-WDR34 determined by TMT analysis. Proteomic data were obtained from two  
700 independent experiments. The table shows raw data from one experiment. Similar results were  
701 obtained by normalizing the data with respect to the overexpressed protein abundance. (B)  
702 Schematic of the dynein-2 complex; the heavy chain is shown as two light blue homodimers, light  
703 intermediate chains are shown as hexagons, intermediate chains as extended ovals and light chains  
704 as circles. (Bi and Bii) Model of the dynein-2 complex in absence of (Bi) WDR60 or (Bii) WDR34.

Vuolo et al. *Dynein-2 knockouts define its role in ciliogenesis*.

705 Reduced binding is represented by decreased color intensity. (Bi) In WDR60 KO cells interaction of  
706 HA-WDR34 with DHC2, DYNC2LI1/LIC3, DYNLT1/TCTEX1, DYNLL1/LC8-1, DYNLL2/LC8-2, TCTEX1D2,  
707 and DYNLRB1 is greatly reduced respect to WT cells. (Bii) In WDR34 KO cells interaction of HA-  
708 WDR60 with other components of dynein-2 is mostly unchanged.  
709

## 710 References

- 711 Asante, D., L. Maccarthy-Morrogh, A.K. Townley, M.A. Weiss, K. Katayama, K.J. Palmer, H. Suzuki, C.J.  
712 Westlake, and D.J. Stephens. 2013. A role for the Golgi matrix protein giantin in ciliogenesis  
713 through control of the localization of dynein-2. *J. Cell Sci.* 126:5189-5197.
- 714 Asante, D., N.L. Stevenson, and D.J. Stephens. 2014. Subunit composition of the human cytoplasmic  
715 dynein-2 complex. *J. Cell Sci.* 127:4774-4787.
- 716 Berbari, N.F., A.D. Johnson, J.S. Lewis, C.C. Askwith, and K. Mykytyn. 2008a. Identification of ciliary  
717 localization sequences within the third intracellular loop of G protein-coupled receptors. *Mol*  
718 *Biol Cell.* 19:1540-1547.
- 719 Berbari, N.F., J.S. Lewis, G.A. Bishop, C.C. Askwith, and K. Mykytyn. 2008b. Bardet-Biedl syndrome  
720 proteins are required for the localization of G protein-coupled receptors to primary cilia.  
721 *Proc Natl Acad Sci U S A.* 105:4242-4246.
- 722 Broekhuis, J.R., S. Rademakers, J. Burghoorn, and G. Jansen. 2013. SQL-1, homologue of the Golgi  
723 protein GMAP210, modulates intraflagellar transport in *C. elegans*. *J. Cell Sci.* 126:1785-  
724 1795.
- 725 Chen, L.S., S.J. Shi, P.S. Zou, M. Ma, X.H. Chen, and D.H. Cao. 2016. Identification of novel DYNC2H1  
726 mutations associated with short rib-polydactyly syndrome type III using next-generation  
727 panel sequencing. *Genetics and Molecular Research.* 15.
- 728 Chien, A., S.M. Shih, R. Bower, D. Tritschler, M.E. Porter, and A. Yildiz. 2017. Dynamics of the IFT  
729 machinery at the ciliary tip. *Elife.* 6:1-25.
- 730 Chih, B., P. Liu, Y. Chinn, C. Chalouni, L.G. Komuves, P.E. Hass, W. Sandoval, and A.S. Peterson. 2011.  
731 A ciliopathy complex at the transition zone protects the cilia as a privileged membrane  
732 domain. *Nat. Cell Biol.* 14:61-72.
- 733 Cossu, C., F. Incani, M.L. Serra, A. Coiana, G. Crisponi, L. Boccone, and M.C. Rosatelli. 2016. New  
734 mutations in DYNC2H1 and WDR60 genes revealed by whole-exome sequencing in two  
735 unrelated Sardinian families with Jeune asphyxiating thoracic dystrophy. *Clin. Chim. Acta.*  
736 455:172-180.
- 737 Criswell, P.S., L.E. Ostrowski, and D.J. Asai. 1996. A novel cytoplasmic dynein heavy chain: expression  
738 of DHC1b in mammalian ciliated epithelial cells. *J. Cell Sci.* 109 ( Pt 7):1891-1898.
- 739 Dagoneau, N., M. Goulet, D. Genevieve, Y. Sznajder, J. Martinovic, S. Smithson, C. Huber, G. Baujat, E.  
740 Flori, L. Tecco, D. Cavalcanti, A.L. Delezoide, V. Serre, M. Le Merrer, A. Munnich, and V.  
741 Cormier-Daire. 2009. DYNC2H1 mutations cause asphyxiating thoracic dystrophy and short  
742 rib-polydactyly syndrome, type III. *Am. J. Hum. Genet.* 84:706-711.
- 743 El Hokayem, J., C. Huber, A. Couvé, J. Aziza, G. Baujat, R. Bouvier, D.P. Cavalcanti, F.A. Collins, M.-P.  
744 Cordier, A.-L. Delezoide, M. Gonzales, D. Johnson, M. Le Merrer, A. Levy-Mozziconacci, P.  
745 Loget, D. Martin-Coignard, J. Martinovic, G.R. Mortier, M.-J. Perez, J. Roume, G. Scarano, A.  
746 Munnich, and V. Cormier-Daire. 2012. NEK1 and DYNC2H1 are both involved in short rib  
747 polydactyly Majewski type but not in Beemer Langer cases. *J. Med. Genet.* 49:227-233.

- 748 Engel, B.D., H. Ishikawa, K.A. Wemmer, S. Geimer, K.I. Wakabayashi, M. Hirono, B. Craige, G.J.  
749 Pazour, G.B. Witman, R. Kamiya, and W.F. Marshall. 2012. The role of retrograde  
750 intraflagellar transport in flagellar assembly, maintenance, and function. *J. Cell Biol.* 199:151-  
751 167.
- 752 Fan, L., S. Pellegrin, A. Scott, and H. Mellor. 2010. The small GTPase Rif is an alternative trigger for  
753 the formation of actin stress fibers in epithelial cells. *J Cell Sci.* 123:1247-1252.
- 754 Follit, J.A., R.A. Tuft, K.E. Fogarty, and G.J. Pazour. 2006. The intraflagellar transport protein IFT20 is  
755 associated with the Golgi complex and is required for cilia assembly. *Mol Biol Cell.* 17:3781-  
756 3792.
- 757 Garcia-Gonzalo, F.R., K.C. Corbit, M.S. Simerol-Piquer, G. Ramaswami, E.A. Otto, T.R. Noriega, A.D.  
758 Seol, J.F. Robinson, C.L. Bennett, D.J. Josifova, J.M. Garcia-Verdugo, N. Katsanis, F.  
759 Hildebrandt, and J.F. Reiter. 2011. A transition zone complex regulates mammalian  
760 ciliogenesis and ciliary membrane composition. *Nat Genet.* 43:776-784.
- 761 Garcia-Gonzalo, F.R., and J.F. Reiter. 2017. Open Sesame: How Transition Fibers and the Transition  
762 Zone Control Ciliary Composition. *Cold Spring Harb Perspect Biol.* 9.
- 763 Gilliam, J.C., J.T. Chang, I.M. Sandoval, Y. Zhang, T. Li, S.J. Pittler, W. Chiu, and T.G. Wensel. 2012.  
764 Three-dimensional architecture of the rod sensory cilium and its disruption in retinal  
765 neurodegeneration. *Cell.* 151:1029-1041.
- 766 Goetz, J.G., E. Steed, R.R. Ferreira, S. Roth, C. Ramspacher, F. Boselli, G. Charvin, M. Liebling, C.  
767 Wyart, Y. Schwab, and J. Vermot. 2014. Endothelial cilia mediate low flow sensing during  
768 zebrafish vascular development. *Cell Rep.* 6:799-808.
- 769 Goetz, S.C., and K.V. Anderson. 2010. The primary cilium: a signalling centre during vertebrate  
770 development. *Nat Rev Genet.* 11:331-344.
- 771 Gogolidou, P., J.L. Stevens, F. Agueci, J. Keynton, G. Wheway, D.T. Grimes, S.H. Patel, H. Hilton, S.K.  
772 Morthorst, A. DiPaolo, D.J. Williams, J. Sanderson, S.V. Khoronenkova, N. Powles-Glover, A.  
773 Ermakov, C.T. Esapa, R. Romero, G.L. Dianov, J. Briscoe, C.A. Johnson, L.B. Pedersen, and D.P.  
774 Norris. 2014. ATMIN is a transcriptional regulator of both lung morphogenesis and  
775 ciliogenesis. *Development.* 141:3966-3977.
- 776 He, M., S. Agbu, and K.V. Anderson. 2017. Microtubule Motors Drive Hedgehog Signaling in Primary  
777 Cilia. *Trends in Cell Biology.* 27:110-125.
- 778 Hou, Y., and G.B. Witman. 2015. Dynein and intraflagellar transport. *Exp. Cell Res.* 334:26-34.
- 779 Hsu, P.D., E.S. Lander, and F. Zhang. 2014. Development and Applications of CRISPR-Cas9 for  
780 Genome Engineering. *Cell.* 157:1262-1278.
- 781 Hua, K., and R.J. Ferland. 2017. Fixation methods can differentially affect ciliary protein  
782 immunolabeling. *Cilia.* 6:5.
- 783 Huber, C., and V. Cormier-Daire. 2012. Ciliary disorder of the skeleton. *Am J Med Genet C Semin Med*  
784 *Genet.* 160C:165-174.
- 785 Huber, C., S. Wu, A.S. Kim, S. Sigaudy, A. Sarukhanov, V. Serre, G. Baujat, K.H. Le Quan Sang, D.L.  
786 Rimoin, D.H. Cohn, A. Munnich, D. Krakow, and V. Cormier-Daire. 2013. WDR34 Mutations

- 787 that Cause Short-Rib Polydactyly Syndrome Type III/Severe Asphyxiating Thoracic Dysplasia  
788 Reveal a Role for the NF-kappaB Pathway in Cilia. *Am. J. Hum. Genet.* 93:926-931.
- 789 Jensen, V.L., and M.R. Leroux. 2017. Gates for soluble and membrane proteins, and two trafficking  
790 systems (IFT and LIFT), establish a dynamic ciliary signaling compartment. *Curr. Opin. Cell*  
791 *Biol.* 47:83-91.
- 792 Kessler, K., I. Wunderlich, S. Uebe, N.S. Falk, A. Giessl, J.H. Brandstatter, B. Popp, P. Klinger, A.B.  
793 Ekici, H. Sticht, H.G. Dorr, A. Reis, R. Roepman, E. Seemanova, and C.T. Thiel. 2015. DYNC2LI1  
794 mutations broaden the clinical spectrum of dynein-2 defects. *Sci Rep.* 5:11649.
- 795 Labun, K., T.G. Montague, J.A. Gagnon, S.B. Thyme, and E. Valen. 2016. CHOPCHOP v2: a web tool for  
796 the next generation of CRISPR genome engineering. *Nucleic Acids Res.* 44:W272-W276.
- 797 Larkins, C.E., G.D. Aviles, M.P. East, R.A. Kahn, and T. Caspary. 2011. Arl13b regulates ciliogenesis  
798 and the dynamic localization of Shh signaling proteins. *Mol Biol Cell.* 22:4694-4703.
- 799 Li, A., M. Saito, J.Z. Chuang, Y.Y. Tseng, C. Dedesma, K. Tomizawa, T. Kaitsuka, and C.H. Sung. 2011.  
800 Ciliary transition zone activation of phosphorylated Tctex-1 controls ciliary resorption, S-  
801 phase entry and fate of neural progenitors. *Nat. Cell Biol.*
- 802 Li, W., P. Yi, and G. Ou. 2015. Somatic CRISPR-Cas9-induced mutations reveal roles of embryonically  
803 essential dynein chains in *Caenorhabditis elegans* cilia. *The Journal of Cell Biology.* 208:683-  
804 692.
- 805 Liem, K.F., Jr., A. Ashe, M. He, P. Satir, J. Moran, D. Beier, C. Wicking, and K.V. Anderson. 2012. The  
806 IFT-A complex regulates Shh signaling through cilia structure and membrane protein  
807 trafficking. *The Journal of cell biology.* 197:789-800.
- 808 May, S.R., A.M. Ashique, M. Karlen, B. Wang, Y. Shen, K. Zarbalis, J. Reiter, J. Ericson, and A.S.  
809 Peterson. 2005. Loss of the retrograde motor for IFT disrupts localization of Smo to cilia and  
810 prevents the expression of both activator and repressor functions of Gli. *Dev. Biol.* 287:378-  
811 389.
- 812 McInerney-Leo, A.M., M. Schmidts, C.R. Cortes, P.J. Leo, B. Gener, A.D. Courtney, B. Gardiner, J.A.  
813 Harris, Y. Lu, M. Marshall, U.K. Consortium, P.J. Scambler, P.L. Beales, M.A. Brown, A. Zankl,  
814 H.M. Mitchison, E.L. Duncan, and C. Wicking. 2013. Short-rib polydactyly and Jeune  
815 syndromes are caused by mutations in WDR60. *Am. J. Hum. Genet.* 93:515-523.
- 816 Mei, L., Y. Huang, Q. Pan, W. Su, Y. Quan, D. Liang, and L. Wu. 2015. Targeted next-generation  
817 sequencing identifies novel compound heterozygous mutations of DYNC2H1 in a fetus with  
818 short rib-polydactyly syndrome, type III. *Clinica chimica acta; international journal of clinical*  
819 *chemistry.* 447:47-51.
- 820 Merrill, A.E., B. Merriman, C. Farrington-Rock, N. Camacho, E.T. Sebald, V.A. Funari, M.J. Schibler,  
821 M.H. Firestein, Z.A. Cohn, M.A. Priore, A.K. Thompson, D.L. Rimoin, S.F. Nelson, D.H. Cohn,  
822 and D. Krakow. 2009. Ciliary Abnormalities Due to Defects in the Retrograde Transport  
823 Protein DYNC2H1 in Short-Rib Polydactyly Syndrome. *Am. J. Hum. Genet.* 84:542-549.
- 824 Mijalkovic, J., B. Prevo, F. Oswald, P. Mangeol, and E.J.G. Peterman. 2017. Ensemble and single-  
825 molecule dynamics of IFT dynein in *Caenorhabditis elegans* cilia. *Nat Commun.* 8:14591.

- 826 Mikami, A., S.H. Tynan, T. Hama, K. Luby-Phelps, T. Saito, J.E. Crandall, J.C. Besharse, and R.B. Vallee.  
827 2002. Molecular structure of cytoplasmic dynein 2 and its distribution in neuronal and  
828 ciliated cells. *J. Cell Sci.* 115:4801-4808.
- 829 Ocbina, P.J., J.T. Eggenschwiler, I. Moskowitz, and K.V. Anderson. 2011. Complex interactions  
830 between genes controlling trafficking in primary cilia. *Nat. Genet.* 43:547-553.
- 831 Okamoto, T., K. Nagaya, Y. Kawata, H. Asai, E. Tsuchida, F. Nohara, K. Okajima, and H. Azuma. 2015.  
832 Novel compound heterozygous mutations in DYNC2H1 in a patient with severe short-rib  
833 polydactyly syndrome type III phenotype. *Congenital Anomalies.* 55:155-157.
- 834 Patel-King, R.S., R.M. Gilberti, E.F.Y. Hom, and S.M. King. 2013. WD60/FAP163 is a dynein  
835 intermediate chain required for retrograde intraflagellar transport in cilia. *Mol. Biol. Cell.*  
836 24:2668-2677.
- 837 Pedersen, L.B., S. Geimer, and J.L. Rosenbaum. 2006. Dissecting the molecular mechanisms of  
838 intraflagellar transport in *Chlamydomonas*. *Curr. Biol.* 16:450-459.
- 839 Prevo, B., P. Mangeol, F. Oswald, J.M. Scholey, and E.J. Peterman. 2015. Functional differentiation of  
840 cooperating kinesin-2 motors orchestrates cargo import and transport in *C. elegans* cilia.  
841 *Nat. Cell Biol.* 17:1536-1545.
- 842 Reck, J., A.M. Schauer, K. VanderWaal Mills, R. Bower, D. Tritschler, C.A. Perrone, and M.E. Porter.  
843 2016. The role of the dynein light intermediate chain in retrograde IFT and flagellar function  
844 in *Chlamydomonas*. *Mol. Biol. Cell.* 27:2404-2422.
- 845 Reiter, J.F., and M.R. Leroux. 2017. Genes and molecular pathways underpinning ciliopathies. *Nat*  
846 *Rev Mol Cell Biol.* 18:533-547.
- 847 Roberts, A.J., T. Kon, P.J. Knight, K. Sutoh, and S.A. Burgess. 2013. Functions and mechanics of dynein  
848 motor proteins. *Nature reviews. Molecular cell biology.* 14:713-726.
- 849 Rompolas, P., L.B. Pedersen, R.S. Patel-King, and S.M. King. 2007. *Chlamydomonas* FAP133 is a  
850 dynein intermediate chain associated with the retrograde intraflagellar transport motor. *J.*  
851 *Cell Sci.* 120:3653-3665.
- 852 Schmidts, M., H.H. Arts, E.M. Bongers, Z. Yap, M.M. Oud, D. Antony, L. Duijkers, R.D. Emes, J. Stalker,  
853 J.B. Yntema, V. Plagnol, A. Hoischen, C. Gilissen, E. Forsythe, E. Lausch, J.A. Veltman, N.  
854 Roeleveld, A. Superti-Furga, A. Kutkowska-Kazmierczak, E.J. Kamsteeg, N. Elcioglu, M.C. van  
855 Maarle, L.M. Graul-Neumann, K. Devriendt, S.F. Smithson, D. Wellesley, N.E. Verbeek, R.C.  
856 Hennekam, H. Kayserili, P.J. Scambler, P.L. Beales, N.V. Knoers, R. Roepman, and H.M.  
857 Mitchison. 2013a. Exome sequencing identifies DYNC2H1 mutations as a common cause of  
858 asphyxiating thoracic dystrophy (Jeune syndrome) without major polydactyly, renal or  
859 retinal involvement. *J. Med. Genet.* 50:309-323.
- 860 Schmidts, M., Y. Hou, C.R. Cortes, D.A. Mans, C. Huber, K. Boldt, M. Patel, J. van Reeuwijk, J.M. Plaza,  
861 S.E. van Beersum, Z.M. Yap, S.J. Letteboer, S.P. Taylor, W. Herridge, C.A. Johnson, P.J.  
862 Scambler, M. Ueffing, H. Kayserili, D. Krakow, S.M. King, P.L. Beales, L. Al-Gazali, C. Wicking,  
863 V. Cormier-Daire, R. Roepman, H.M. Mitchison, G.B. Witman, and Uk10K. 2015. TCTEX1D2  
864 mutations underlie Jeune asphyxiating thoracic dystrophy with impaired retrograde  
865 intraflagellar transport. *Nat Commun.* 6:7074.

- 866 Schmidts, M., J. Vodopiutz, S. Christou-Savina, C.R. Cortés, A.M. McInerney-Leo, R.D. Emes, H.H.  
867 Arts, B. Tüysüz, J. D'Silva, P.J. Leo, T.C. Giles, M.M. Oud, J.A. Harris, M. Koopmans, M.  
868 Marshall, N. Elçioglu, A. Kuechler, D. Bockenbauer, A.T. Moore, L.C. Wilson, A.R. Janecke,  
869 M.E. Hurles, W. Emmet, B. Gardiner, B. Streubel, B. Dopita, A. Zankl, H. Kayserili, P.J.  
870 Scambler, M.A. Brown, P.L. Beales, C. Wicking, UK10K, E.L. Duncan, and H.M. Mitchison.  
871 2013b. Mutations in the gene encoding IFT dynein complex component WDR34 cause Jeune  
872 asphyxiating thoracic dystrophy. *Am. J. Hum. Genet.* 93:932-944.
- 873 Shah, A.S., S.L. Farnen, T.O. Moninger, T.R. Businga, M.P. Andrews, K. Bugge, C.C. Searby, D.  
874 Nishimura, K.A. Brogden, J.N. Kline, V.C. Sheffield, and M.J. Welsh. 2008. Loss of Bardet-Biedl  
875 syndrome proteins alters the morphology and function of motile cilia in airway epithelia.  
876 *Proc Natl Acad Sci U S A.* 105:3380-3385.
- 877 Shi, X., G. Garcia, 3rd, J.C. Van De Weghe, R. McGorty, G.J. Pazour, D. Doherty, B. Huang, and J.F.  
878 Reiter. 2017. Super-resolution microscopy reveals that disruption of ciliary transition-zone  
879 architecture causes Joubert syndrome. *Nat. Cell Biol.* 19:1178-1188.
- 880 Signor, D., K.P. Wedaman, J.T. Orozco, N.D. Dwyer, C.I. Bargmann, L.S. Rose, and J.M. Scholey. 1999.  
881 Role of a class DHC1b dynein in retrograde transport of IFT motors and IFT raft particles  
882 along cilia, but not dendrites, in chemosensory neurons of living *Caenorhabditis elegans*. *J.*  
883 *Cell Biol.* 147:519-530.
- 884 Taipale, M., G. Tucker, J. Peng, I. Krykbaeva, Z.Y. Lin, B. Larsen, H. Choi, B. Berger, A.C. Gingras, and S.  
885 Lindquist. 2014. A quantitative chaperone interaction network reveals the architecture of  
886 cellular protein homeostasis pathways. *Cell.* 158:434-448.
- 887 Taylor, S.P., T.J. Dantas, I. Duran, S. Wu, R.S. Lachman, M.J. Bamshad, J. Shendure, D.a. Nickerson,  
888 S.F. Nelson, D.H. Cohn, R.B. Vallee, and D. Krakow. 2015. Mutations in *DYNC2LI1* disrupt cilia  
889 function and cause short rib polydactyly syndrome. *Nat Commun.* 6:7092.
- 890 Toropova, K., M. Mladenov, and A.J. Roberts. 2017. Intraflagellar transport dynein is autoinhibited  
891 by trapping of its mechanical and track-binding elements. *Nat Struct Mol Biol.* 24:461-468.
- 892 Williams, C.L., J.C. McIntyre, S.R. Norris, P.M. Jenkins, L. Zhang, Q. Pei, K. Verhey, and J.R. Martens.  
893 2014. Direct evidence for BBSome-associated intraflagellar transport reveals distinct  
894 properties of native mammalian cilia. *Nat Commun.* 5:5813.
- 895 Williamson, S.M., D.A. Silva, E. Richey, and H. Qin. 2012. Probing the role of IFT particle complex A  
896 and B in flagellar entry and exit of IFT-dynein in *Chlamydomonas*. *Protoplasts.* 249:851-856.
- 897 Wu, C., J. Li, A. Peterson, K. Tao, and B. Wang. 2017. Loss of dynein-2 intermediate chain *Wdr34*  
898 results in defects in retrograde ciliary protein trafficking and Hedgehog signaling in the  
899 mouse. *Hum Mol Genet.* 26:2386-2397.
- 900 Yee, L.E., and J.F. Reiter. 2015. Ciliary vesicle formation: a prelude to ciliogenesis. *Dev. Cell.* 32:665-  
901 666.
- 902 Yi, P., W.J. Li, M.Q. Dong, and G. Ou. 2017. Dynein-Driven Retrograde Intraflagellar Transport Is  
903 Triphasic in *C. elegans* Sensory Cilia. *Curr. Biol.* 27:1448-1461 e1447.
- 904



Figure 1

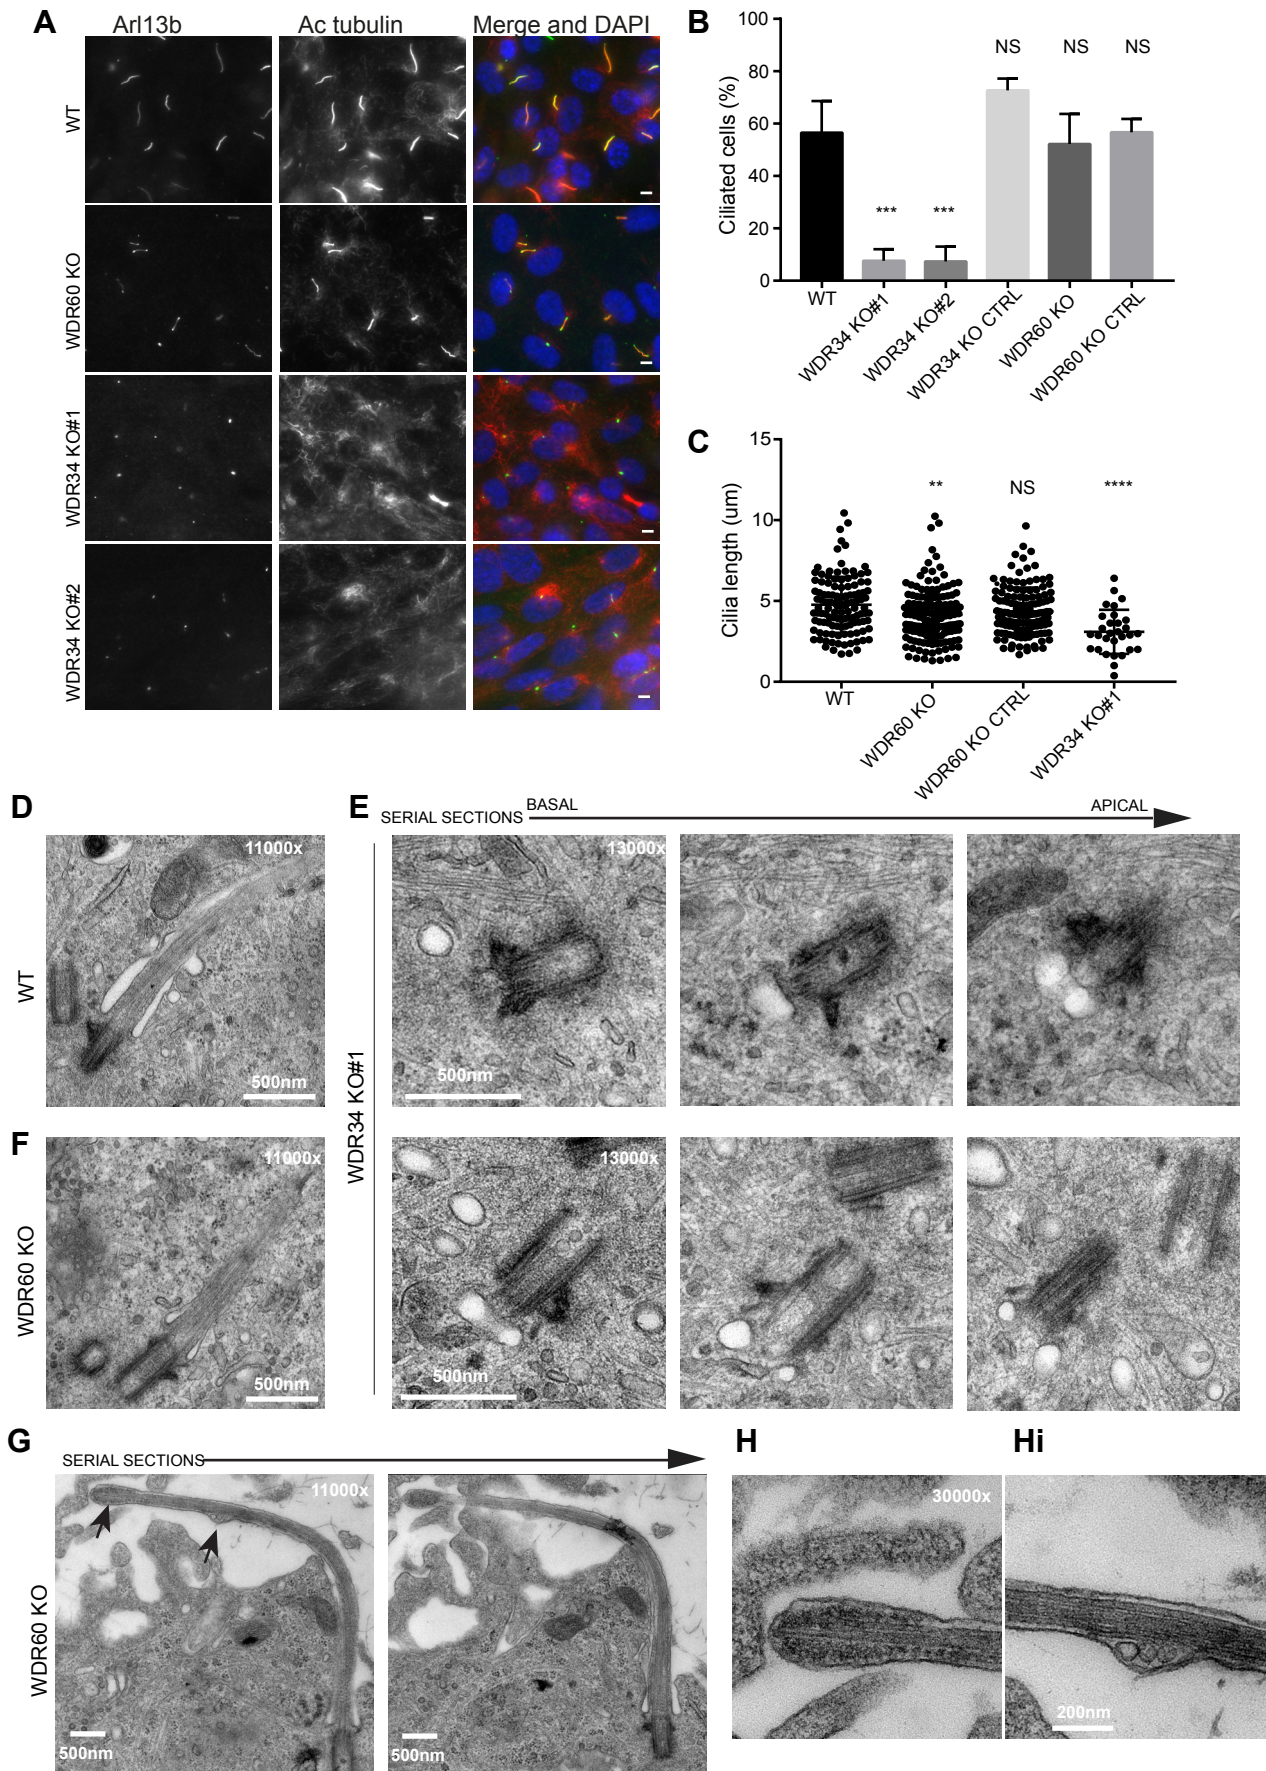

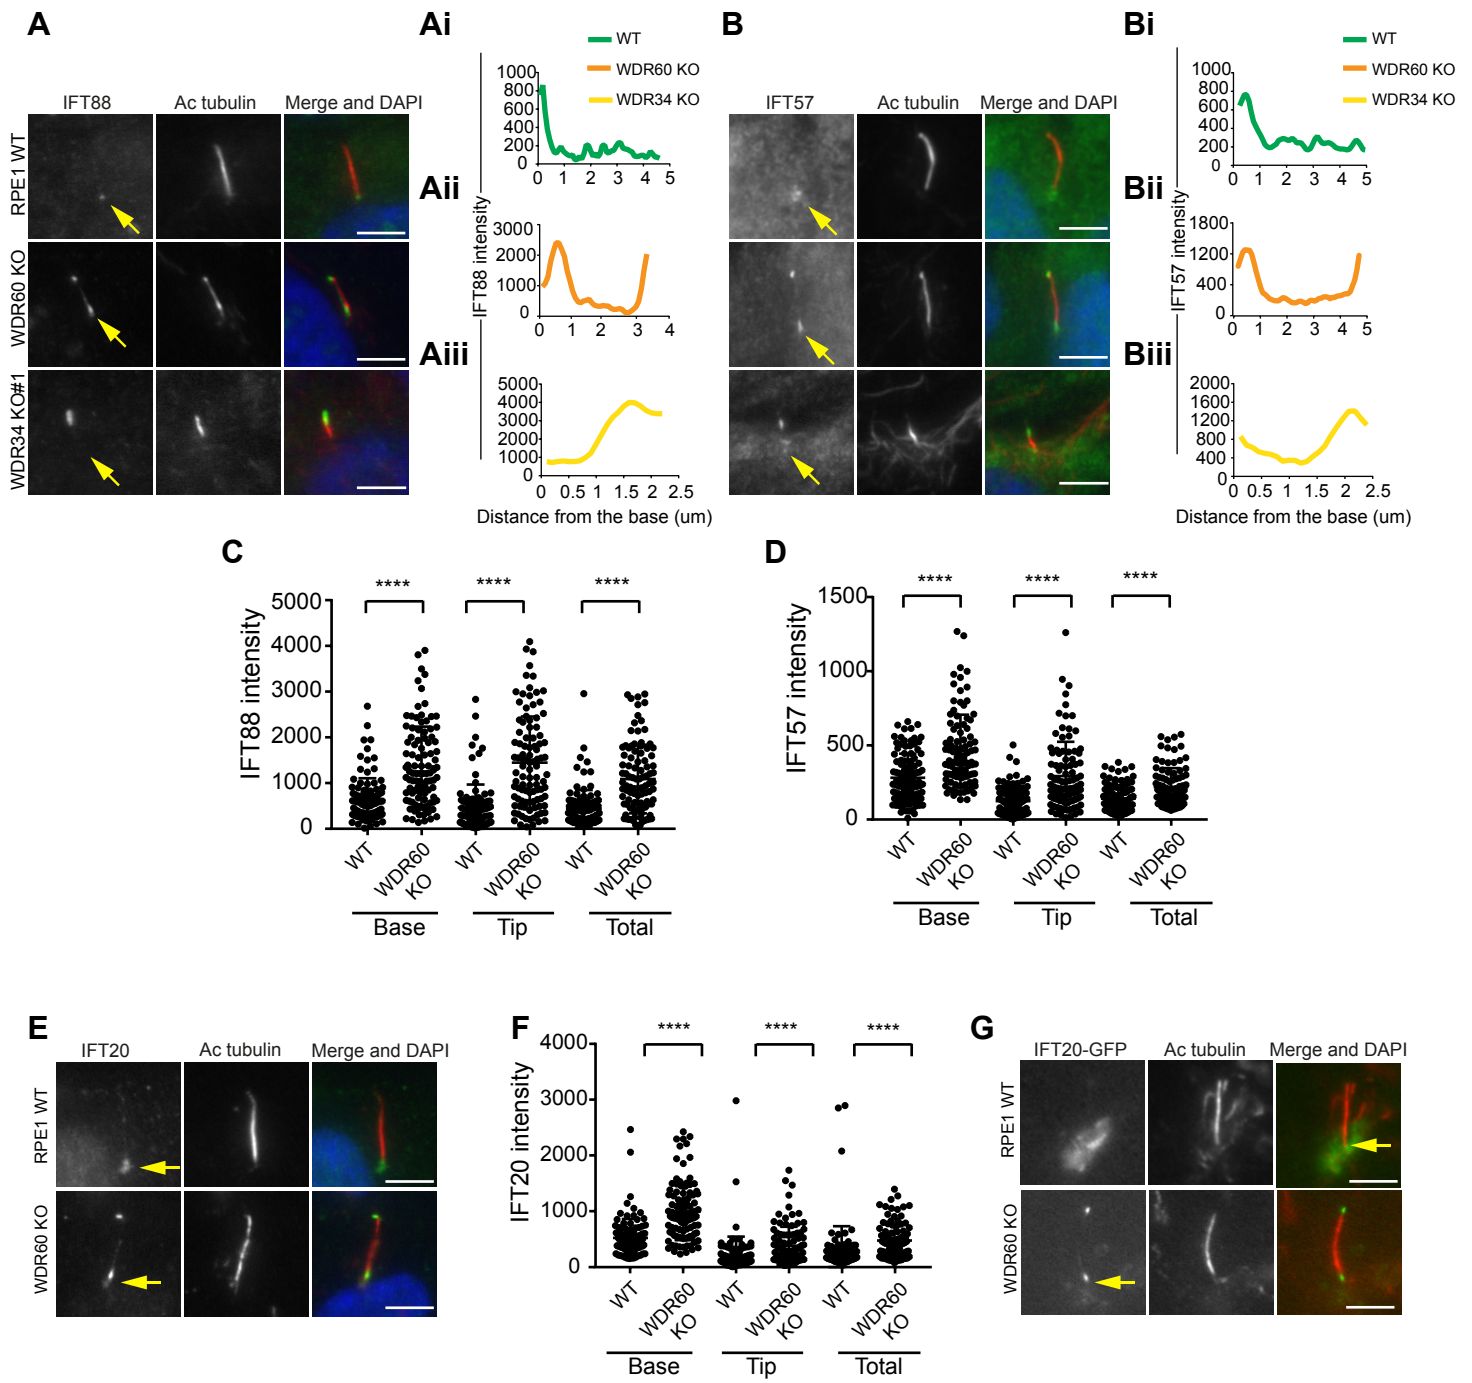

Figure 3

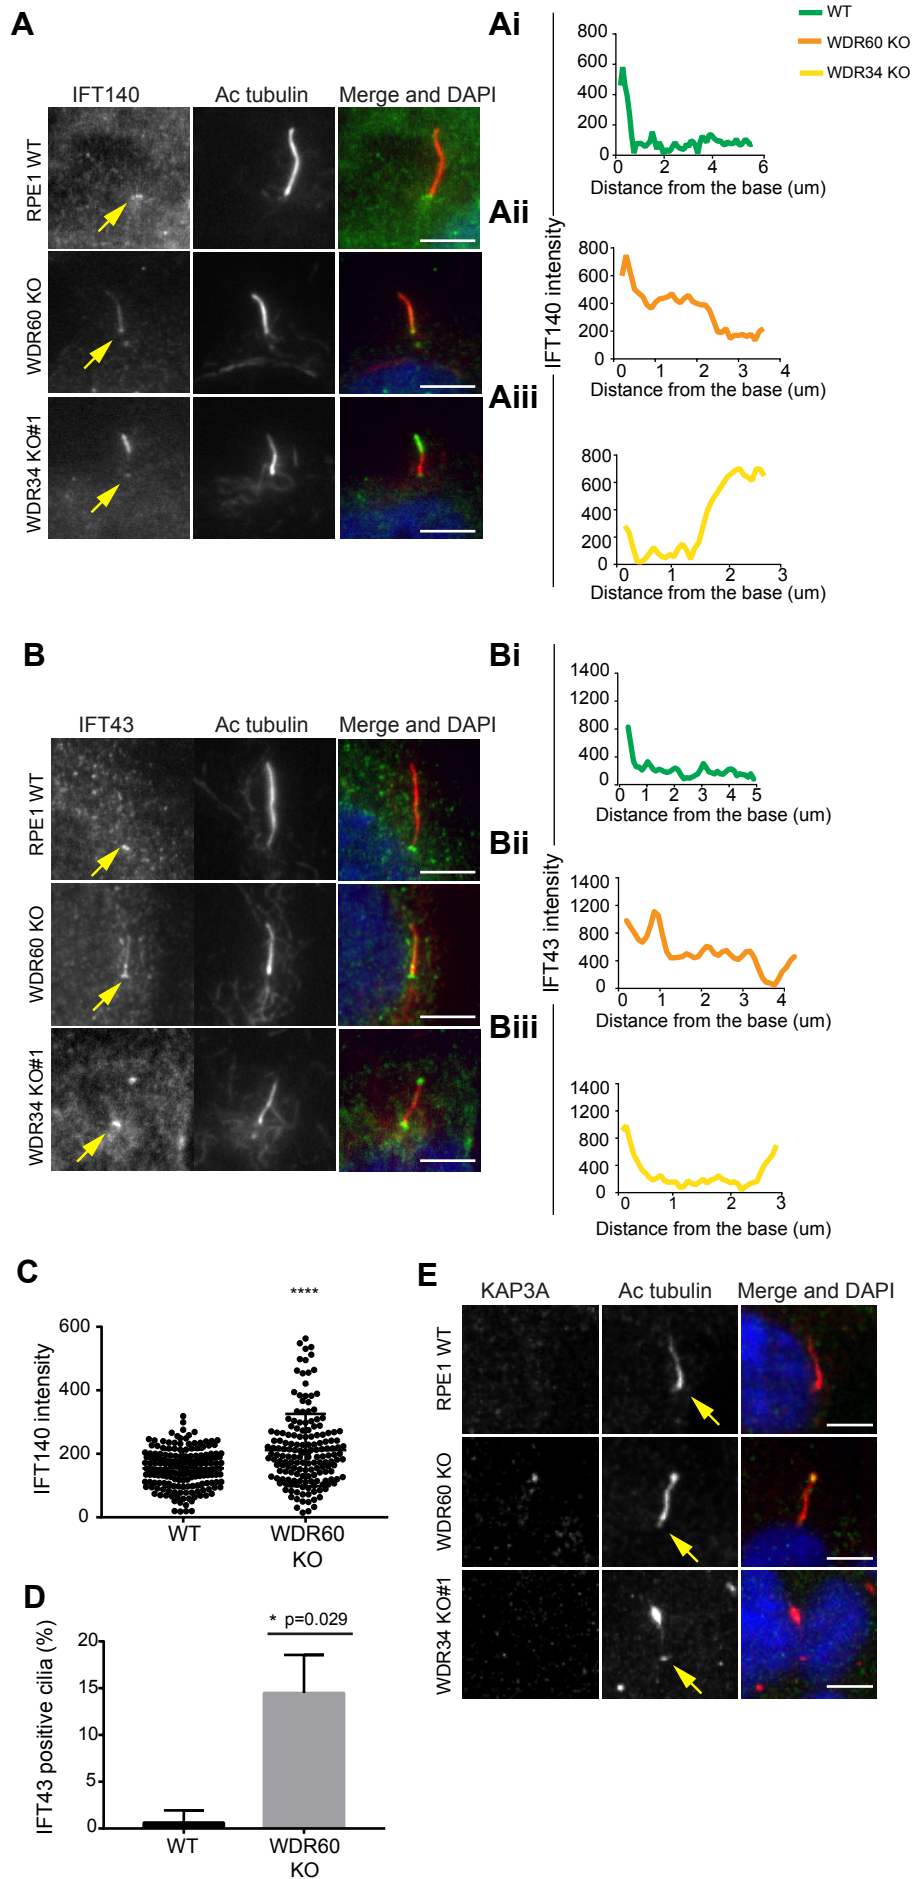

Figure 4

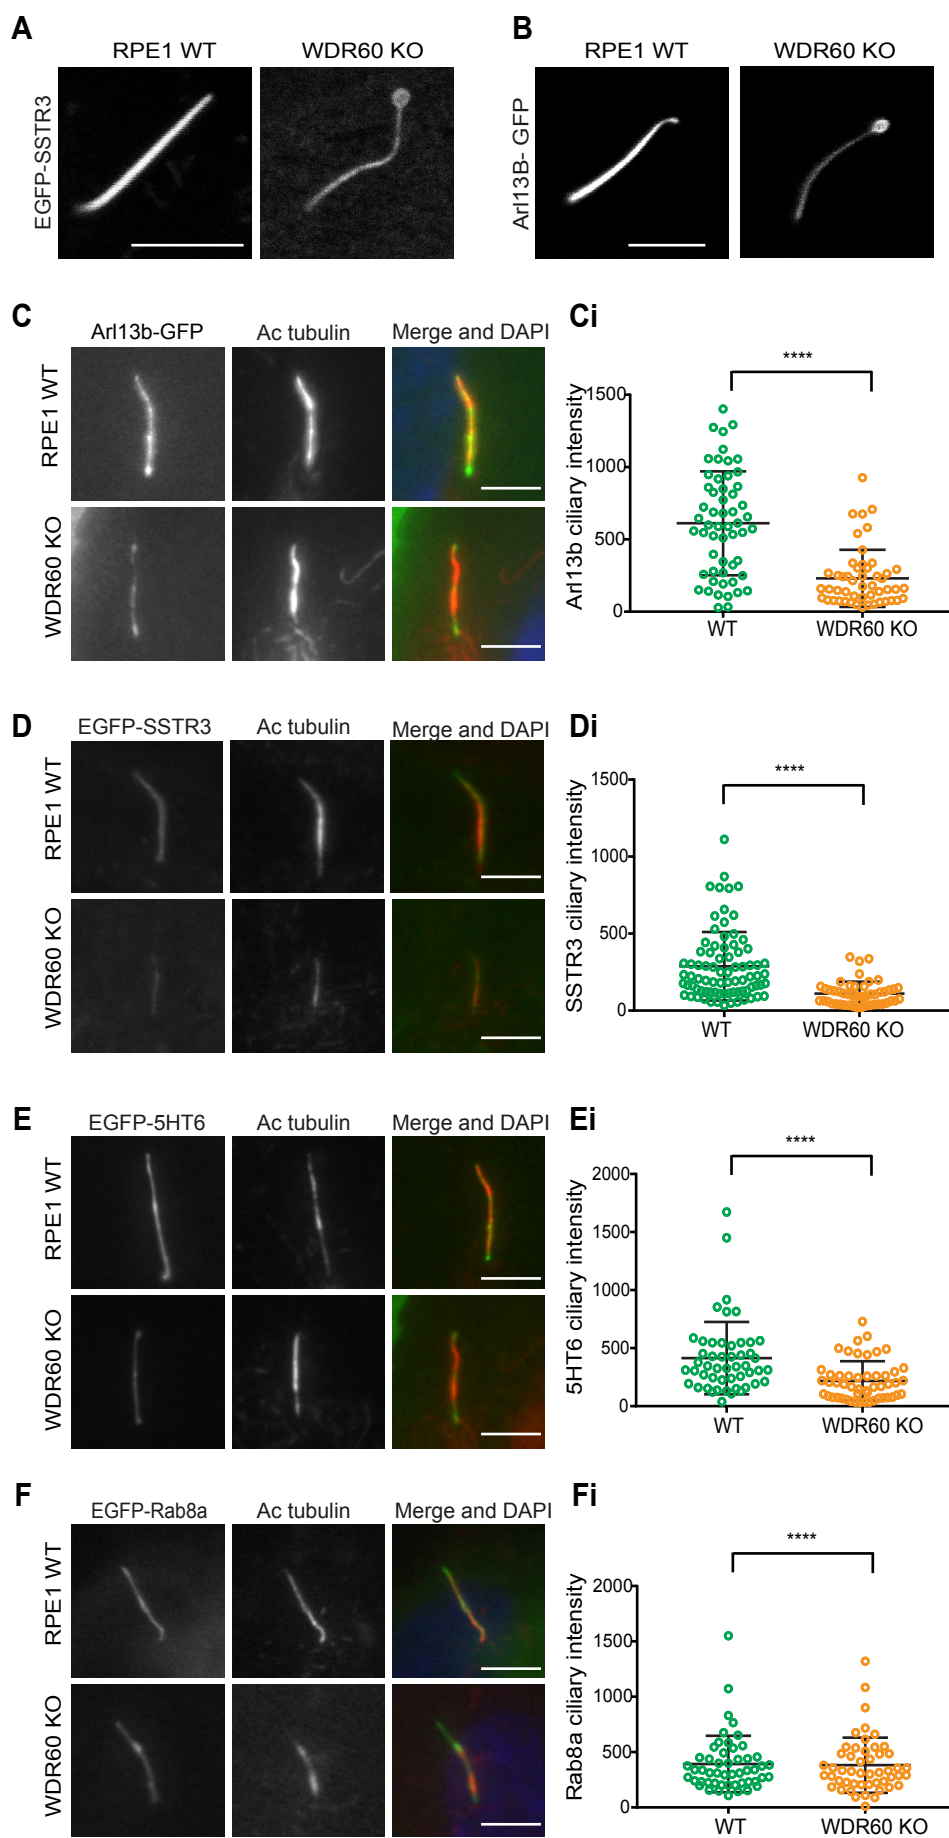

Figure 5

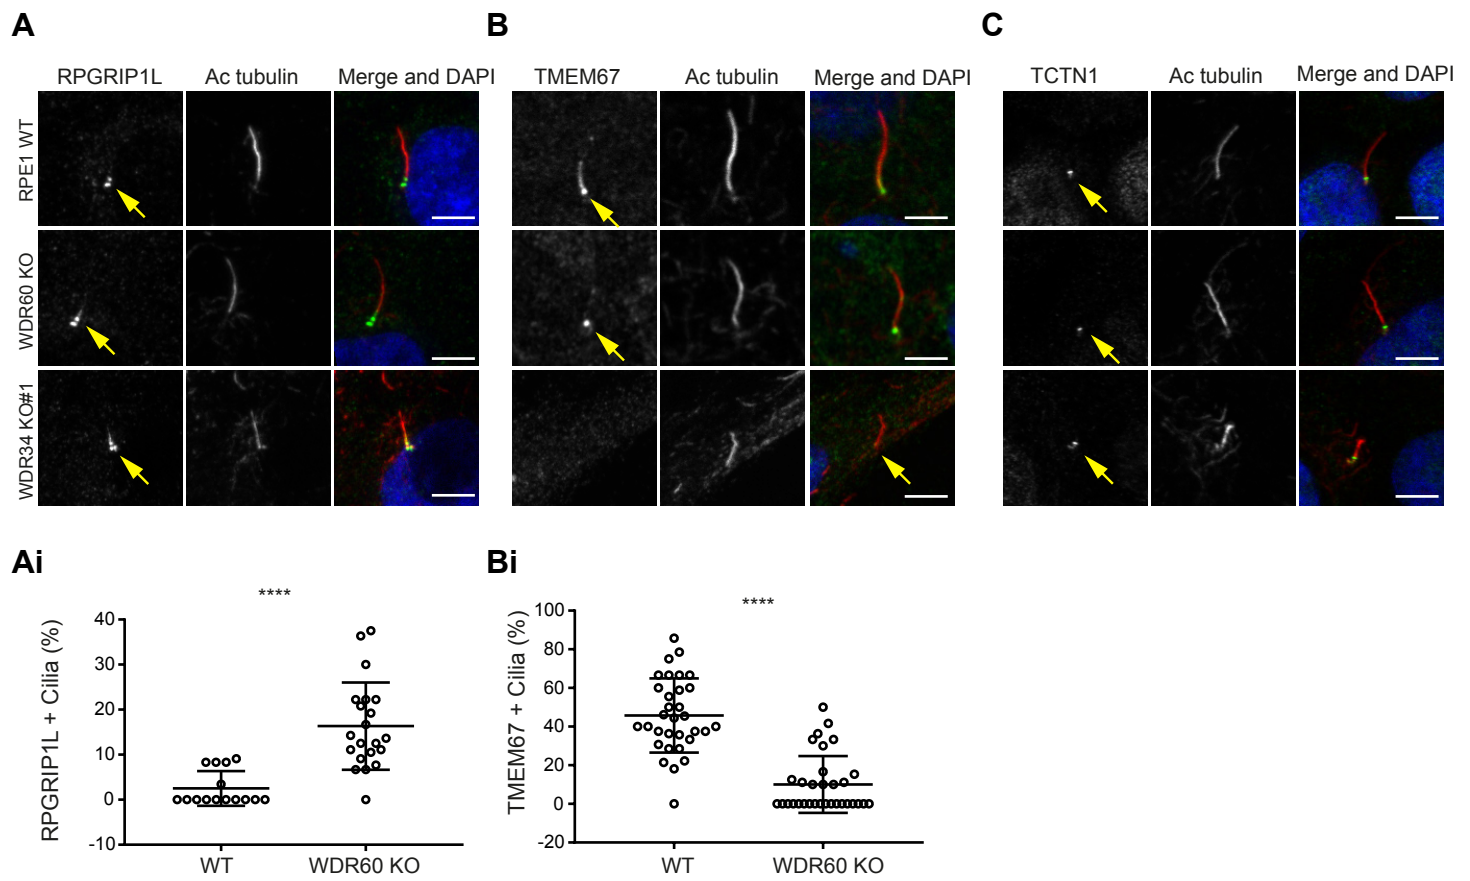

Figure 6

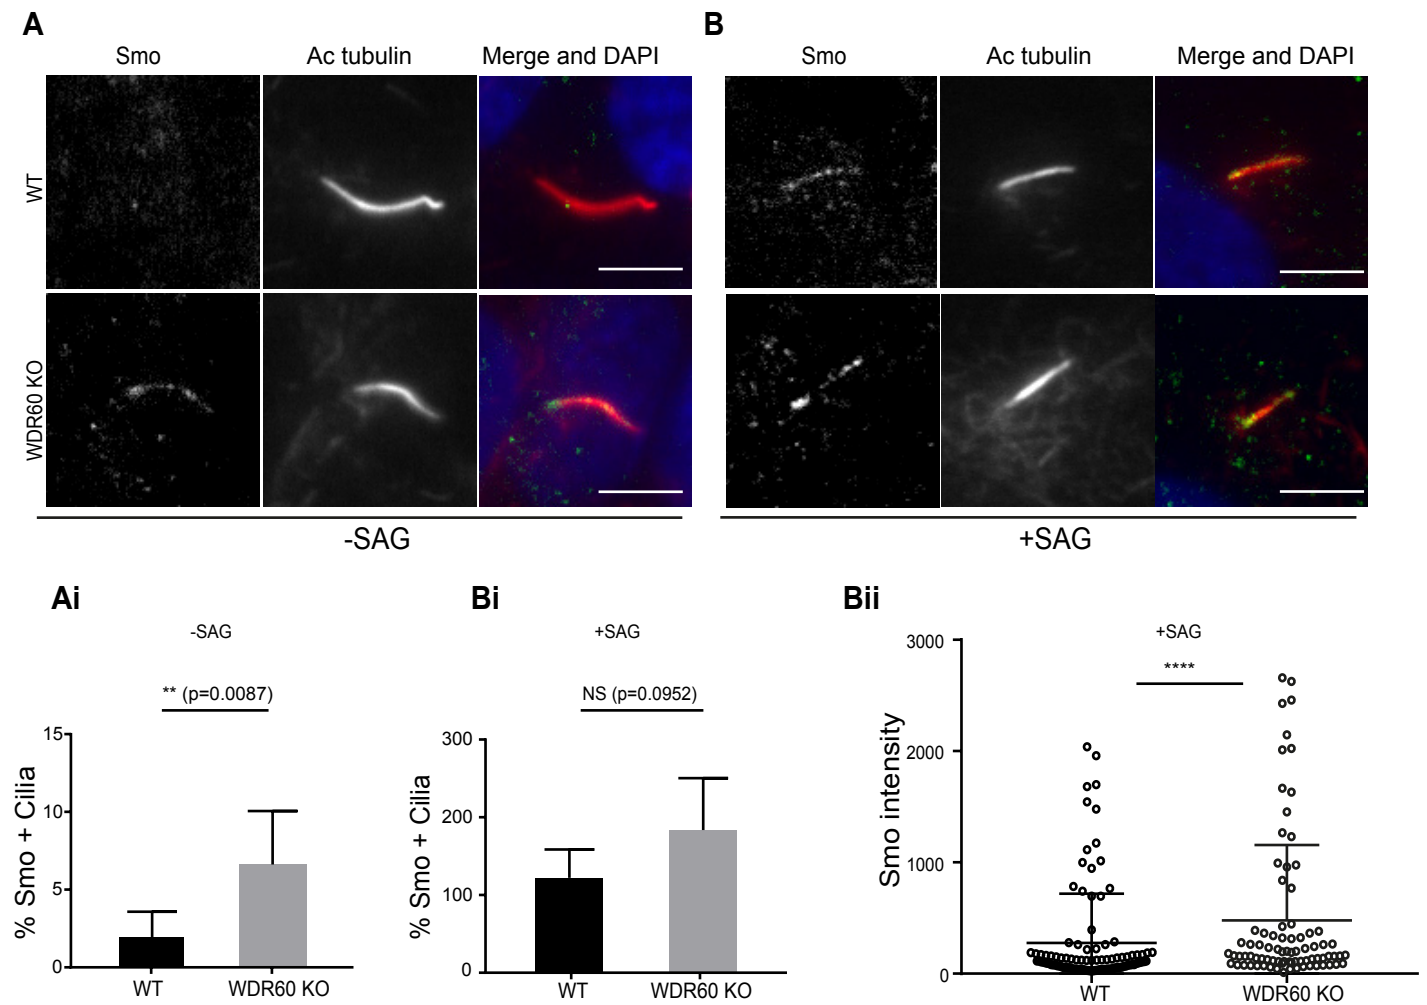

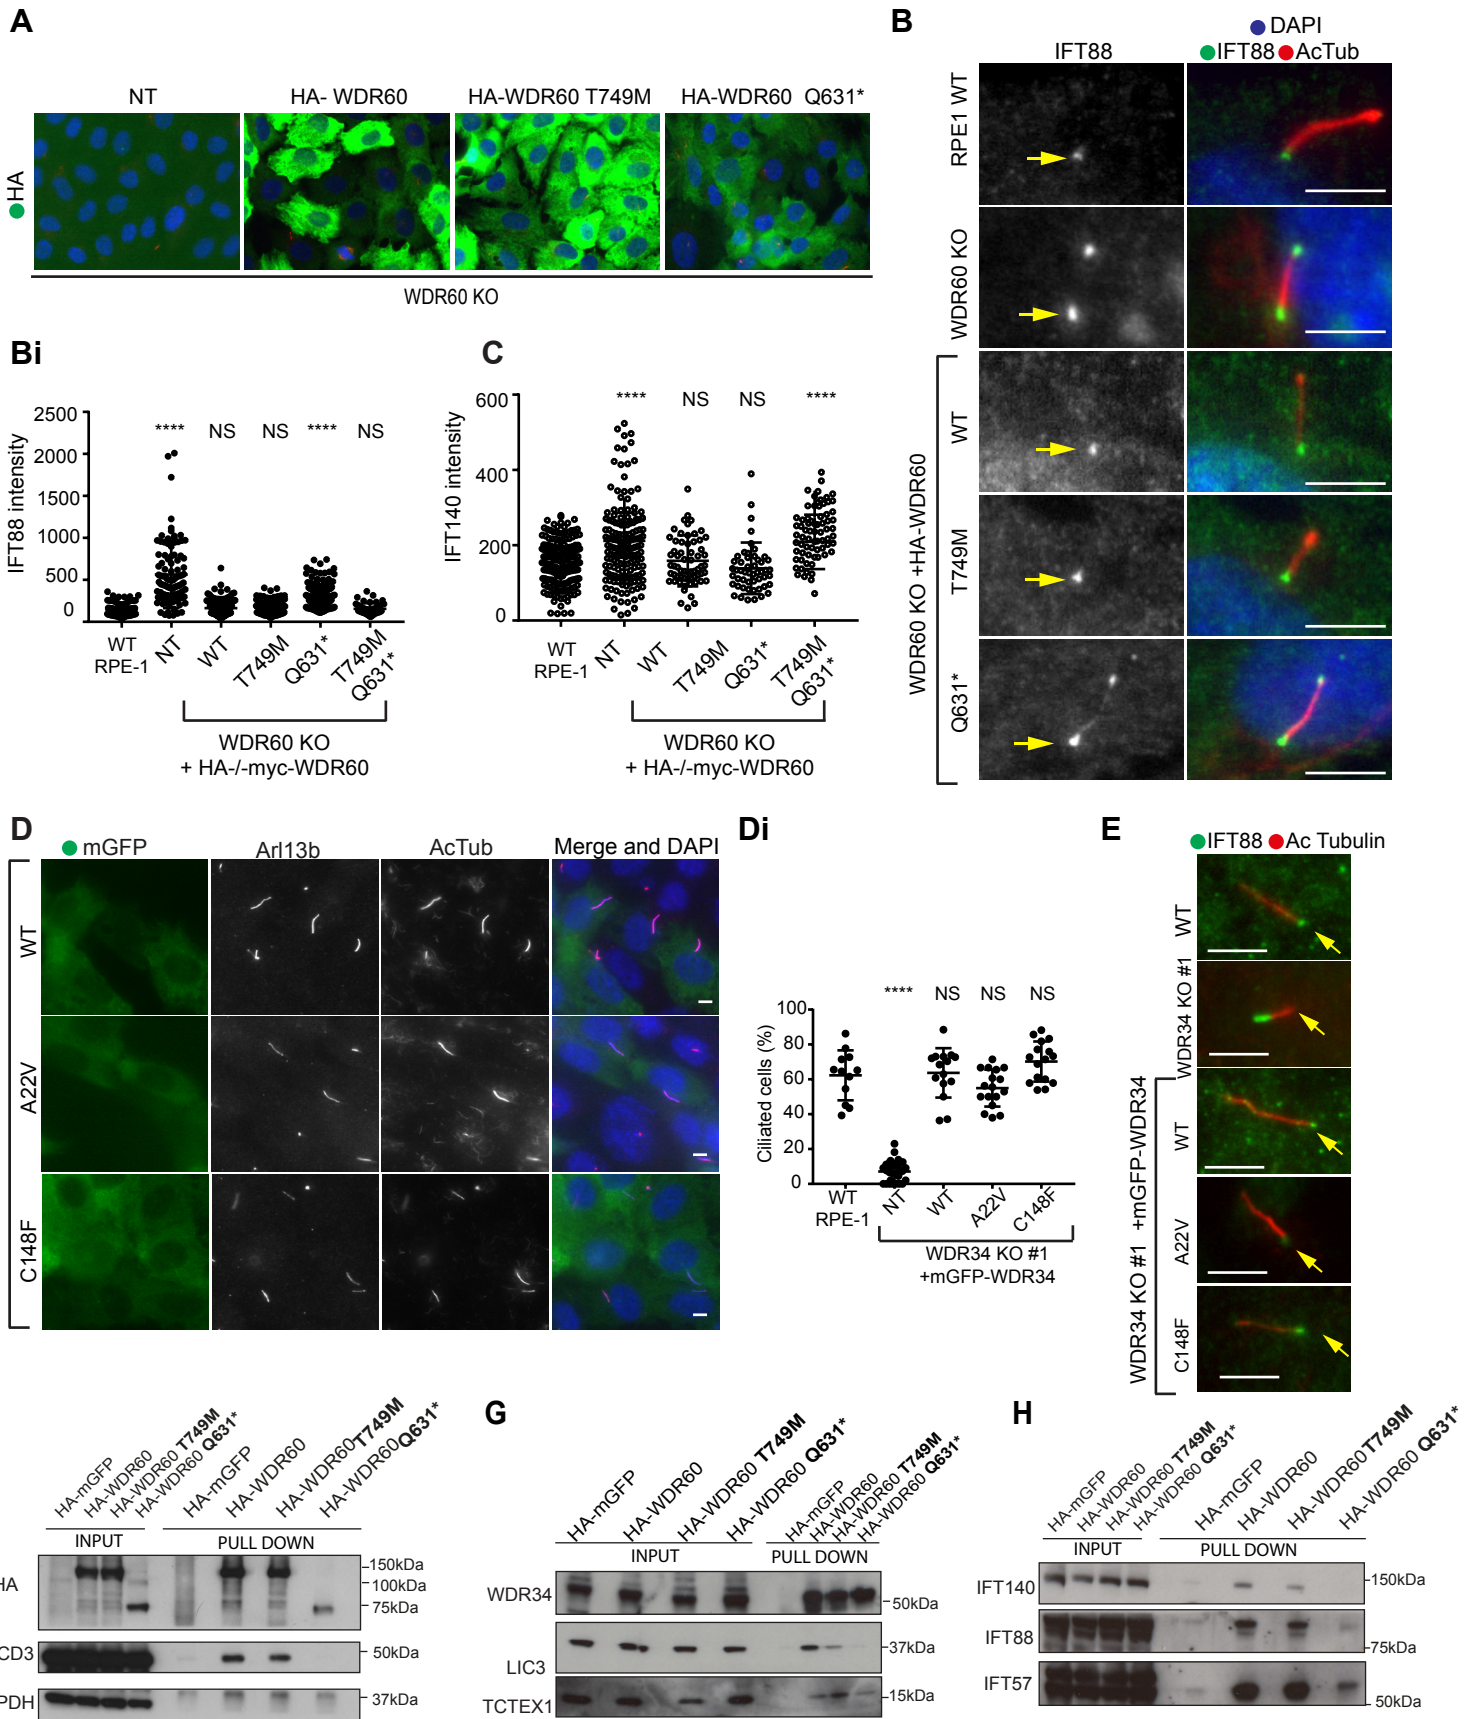

Figure 8

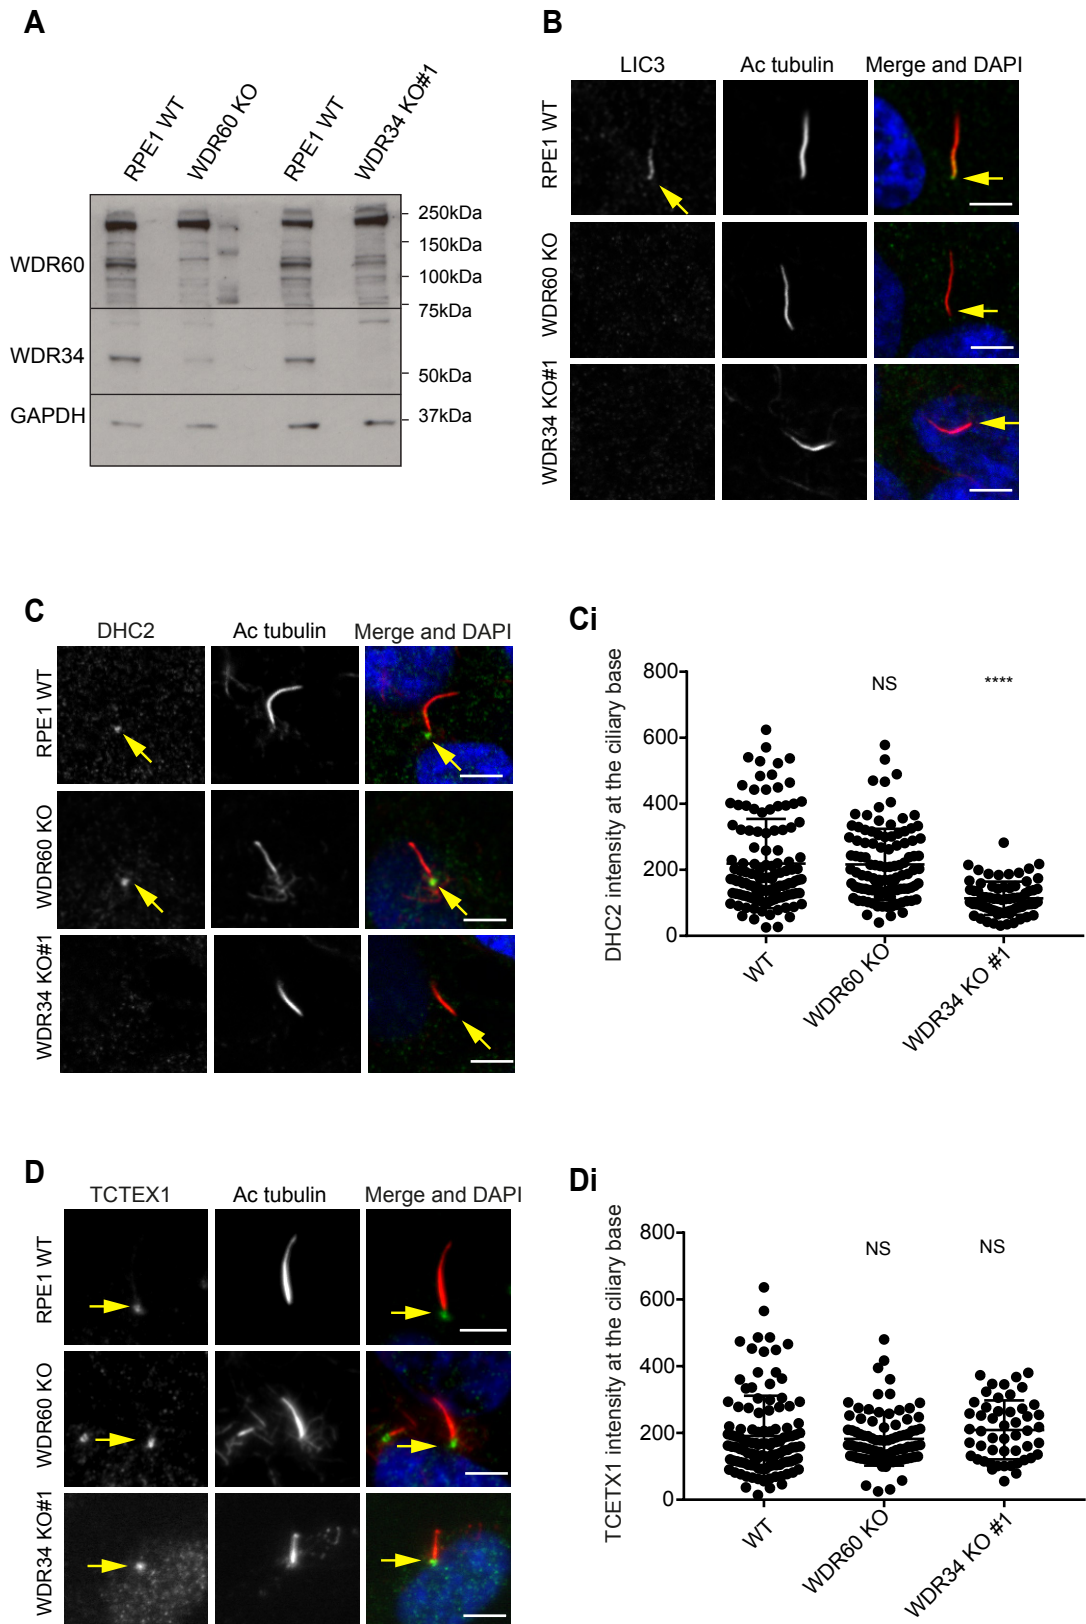



A

| Gene ID  | HA-WDR34<br>(WT)/(WDR60 KO) | HA-WDR60<br>(WT)/(WDR34 KO) |
|----------|-----------------------------|-----------------------------|
| DYNC2H1  | 10.9                        | 1.6                         |
| WDR60    |                             | 0.8                         |
| WDR34    | 1.1                         |                             |
| DYNC2LI1 | 2.6                         | 1.0                         |
| DYNLT1   | 9.4                         | 0.8                         |
| TCTEX1D2 | 2.8                         | 0.8                         |
| DYNLT3   | 2.1                         | 1.7                         |
| DYNLL1   | 1.6                         | 1.1                         |
| DYNLL2   | 1.6                         | 1.2                         |
| DYNLRB1  | 1.7                         | 2.5                         |
| NUDC     | 2.2                         | 0.9                         |
| NUDCD3   | 2.4                         | 1.1                         |
| IFT54    | 1.6                         | 0.8                         |
| IFT57    | 2.3                         | 1.3                         |
| IFT74    | 2.5                         | 1.2                         |
| IFT88    | 2.3                         | 1.4                         |
| IFT172   | 1.7                         | 1.0                         |
| BBS7     | 1.5                         | 0.7                         |
| BBS9     | 1.7                         | 1.0                         |

B

Bi

Bii

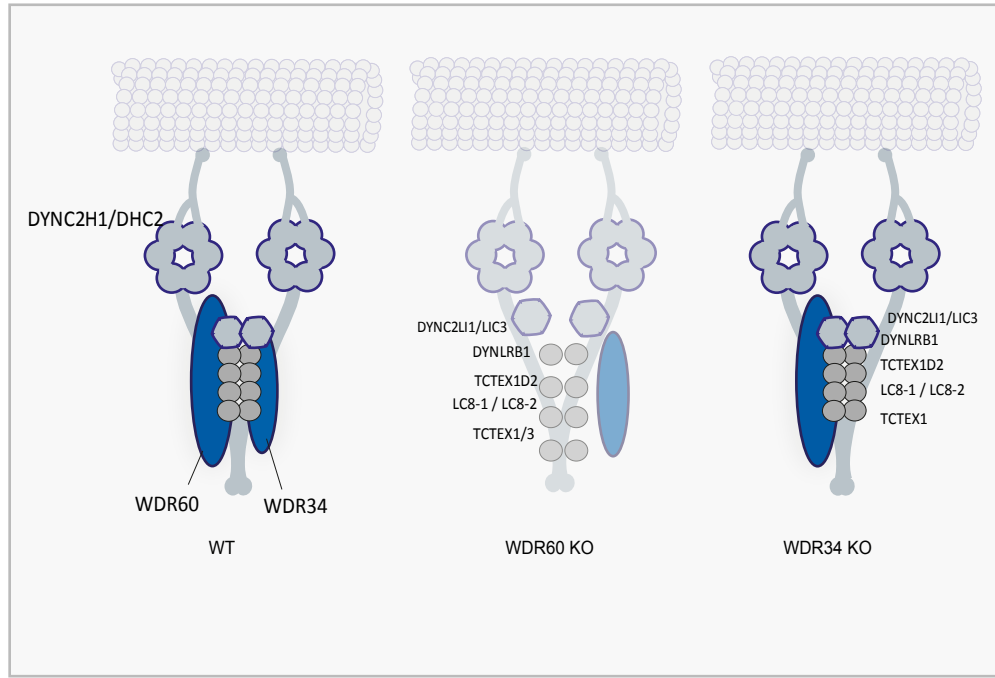

Source: https://www.biorxiv.org/content/10.1101/251694v2.full.pdf
